1 **TITLE:** Royal knifefish generate powerful suction feeding through large neurocranial elevation  
2 and high epaxial muscle power

3

4 **RUNNING TITLE:** Epaxial-dominated feeding in knifefish

5

6 **KEY WORDS:**

7 XROMM, Fluoromicrometry, Muscle strain, Buccal pressure, Body shape, Buccal volume

8

9 Ellen Y. Li<sup>1\*</sup>, Elska B. Kaczmarek<sup>1\*</sup>, Aaron M. Olsen<sup>1,2</sup>, Elizabeth L. Brainerd<sup>1</sup>, Ariel L. Camp<sup>1,3</sup>

10

11 <sup>1</sup>Department of Ecology, Evolution and Organismal Biology, Brown University, Providence RI  
12 02912; <sup>2</sup>3D Anatomy Studios, Providence RI; <sup>3</sup>Department of Musculoskeletal and Ageing  
13 Science, Institute of Life Course and Medical Sciences, University of Liverpool, Liverpool L7  
14 8TX, UK

15

16 \*Co-first authors

17

18 **SUMMARY STATEMENT**

19 Royal knifefish rely on their distinct postcranial morphology--with a curved vertebral column  
20 and large dorsal body muscles--to produce large neurocranial elevation and powerful suction  
21 feeding.

22

23 Author Contributions:

24

25 Conceptualization - ALC, ELB

26 Methodology - ALC, AMO, ELB

27 Software - ALC, AMO, EBK, EYL

28 Formal Analysis - ALC, EYL

29 Investigation - ALC, AMO, EBK, EYL

30 Writing - Original Draft Preparation - EBK, ELB, EYL

31 Writing - Review & Editing - ALC, AMO, EBK, ELB, EYL

32 Visualization - ALC, EBK, EYL

33 Supervision - ALC, AOM, EBK, ELB

34 Project Administration - ELB

35 Funding Acquisition - ALC, ELB

36

37 **ABSTRACT**

38 Suction feeding in ray-finned fishes involves powerful buccal cavity expansion to  
39 accelerate water and food into the mouth. Previous XROMM studies in largemouth bass  
40 (*Micropterus salmoides*), bluegill sunfish (*Lepomis macrochirus*), and channel catfish (*Ictalurus*  
41 *punctatus*) have shown that more than 90% of suction power in high performance strikes comes  
42 from the axial musculature. Thus, the shape of the axial muscles and skeleton may impact  
43 suction feeding mechanics. Royal knifefish (*Chitala blanci*) have an unusual postcranial  
44 morphology, with a ventrally flexed vertebral column and relatively large mass of epaxial  
45 muscle. Based on their body shape, we hypothesized that royal knifefish would generate high  
46 power strikes by utilizing large neurocranial elevation, vertebral column extension, and epaxial  
47 shortening. As predicted, *C. blanci* generated high suction expansion power compared to the  
48 other three species studied to date (up to 160 W), which was achieved by increasing both the rate  
49 of volume change and the intraoral subambient pressure. The large epaxial muscle (25% of body  
50 mass) shortened at high velocities to produce large neurocranial elevation and vertebral  
51 extension (up to 41 deg, combined), as well as high muscle mass-specific power (up to 800 W  
52 kg<sup>-1</sup>). For the highest power strikes, axial muscles generated 95% of the power, and 64% of the  
53 axial muscle mass consisted of the epaxial muscles. The epaxial-dominated suction expansion of  
54 royal knifefish supports our hypothesis that postcranial morphology may be a strong predictor of  
55 suction feeding biomechanics.

56

## 57 INTRODUCTION

58 High performance suction feeding in ray-finned fishes is both fast and forceful, requiring  
59 high power to expand the buccal cavity and suck in prey. Instantaneous suction expansion power  
60 can be measured empirically by using X-ray Reconstruction of Moving Morphology (XROMM)  
61 to measure instantaneous buccal cavity volume and rate of buccal cavity expansion (Camp et al.,  
62 2015). Combined with measurements of subambient buccal pressure, buccal volume  
63 measurements make it possible to calculate instantaneous suction expansion power as the  
64 product of rate of buccal volume change and subambient buccal pressure (Van Wassenbergh et  
65 al., 2015).

66 To date, suction expansion power has been measured with XROMM in three species of  
67 ray-finned fishes: largemouth bass (*Micropterus salmoides*), bluegill sunfish (*Lepomis*  
68 *macrochirus*), and channel catfish (*Ictalurus punctatus*) (Camp et al., 2015; Camp et al., 2018;  
69 Camp et al. 2020). In the highest performance strikes from all three species, the empirically  
70 measured suction power was far too great to have been generated by muscles in the head region  
71 alone. Instead, more than 90% of suction power came from epaxial and hypaxial musculature  
72 (largemouth bass and bluegill sunfish) or the hypaxial musculature (channel catfish).  
73 Furthermore, the axial musculature was found to actively shorten along 60-70% of the length of  
74 the body, encompassing the majority of axial muscle mass (Camp et al., 2015; Camp et al., 2018;  
75 Camp et al., 2020; Jimenez and Brainerd, 2020; Jimenez and Brainerd, 2021). Thus, although it  
76 has long been known that axial musculature contributes to suction feeding (Liem, 1967; Osse,  
77 1969), the ability to measure suction power, muscle length, and activation has revealed that some  
78 fish use nearly their whole bodies for suction feeding. The overall body shape and  
79 musculoskeletal morphology should therefore be considered when studying the biomechanics  
80 and energetics of suction feeding (Camp and Brainerd, 2022).

81 There are several ways the morphology of the body and axial muscles, including skeletal  
82 elements linking the head and body, can impact intraoral pressure, buccal volume, and ultimately  
83 suction power. First, the shape of the body reflects the relative size and distribution of the axial  
84 muscles, which may impact their function during feeding. Carroll et al. (2004) found that deeper-  
85 bodied fish had greater epaxial cross-sectional area and longer epaxial moment arms for cranial  
86 elevation. As a result, deep-bodied bluegill sunfish were capable of greater pressure generation  
87 during feeding than the more fusiform largemouth bass (Carroll et al., 2004). Both the  
88 dorsoventral depth (Fig. 1C) and transverse shape (Fig. 1D) of the body reflect the relative cross-

89 sectional area of the epaxial and hypaxial muscles. While hypaxial muscles typically have  
90 smaller cross-sectional areas anteriorly where they surround the body cavity, these muscles  
91 contribute substantially to suction power in all species studied so far with XROMM.

92 Second, body shape and skeletal anatomy may influence neurocranial elevation, a  
93 common component of mouth expansion and an essential motion for transmitting epaxial muscle  
94 power to the head. Deep-bodied fish with more bony processes (i.e. supraneurals, neural spines,  
95 and pterygiophores) immediately caudal to the neurocranium—like bluegill sunfish—had less  
96 neurocranial elevation than largemouth bass (Jimenez et al., 2018; Camp and Brainerd, 2014;  
97 Camp et al., 2018; Table 2). The channel catfish, which has even more postcranial ossifications,  
98 uses little or no neurocranial elevation (Camp et al., 2020). Rather, catfish relied on hypaxial  
99 muscle power, transmitted via retraction of their robust pectoral girdle (Camp et al., 2020). These  
100 inter-species comparisons demonstrate emerging links between postcranial morphology and  
101 suction feeding power and biomechanics. However, so far only a small sample of body shapes  
102 and species have been investigated.

103 The royal knifefish (*Chitala blanci*) offers an interesting model for studying suction  
104 feeding, as it is both morphologically and phylogenetically distinct from species previously  
105 studied with XROMM. The royal knifefish is a member of the family Notopteridae (Order  
106 Osteoglossiformes) and is not closely related to channel catfish (Order Siluriformes) nor  
107 largemouth bass and bluegill sunfish (Order Centrarchiformes). Morphologically, royal knifefish  
108 have a ventrally flexed vertebral column and depressed neurocranium in their resting posture,  
109 dorsoventrally deep epaxial musculature, and laterally compressed body (Fig. 1; Coombs and  
110 Popper, 1982; Sanford and Lauder, 1989). In addition, royal knifefish have an inverted teardrop  
111 shaped transverse cross-section, with the body being thickest at the epaxial muscles and tapering  
112 in thickness ventrally towards the hypaxials and anal fin (Fig. 1B).

113 Of the species previously studied with XROMM, bluegill sunfish have the most similar  
114 body shape to royal knifefish. Both species have laterally compressed and deep bodies, ventrally  
115 curved vertebral columns, and dorsoventrally deep epaxial muscles (Fig. 1). Similar to bluegill  
116 sunfish, the epaxial muscles of royal knifefish provide a relatively large cross-sectional area and  
117 large moment arm, which may enable them to generate similarly large subambient buccal  
118 pressures. Compared to largemouth bass and channel catfish, bluegill sunfish generated the most  
119 powerful suction expansion relative to their body and muscle mass, by generating greater  
120 subambient buccal pressures with smaller axial muscles (Camp et al., 2018). Since royal

121 knifefish have similar epaxial morphology, we expect they can also generate powerful suction  
122 expansion, relative to their muscle mass.

123         Royal knifefish also differ from bluegill sunfish in key ways, which we hypothesize will  
124 result in greater neurocranial elevation and epaxial contribution in royal knifefish. Royal  
125 knifefish have a more laterally compressed and craniocaudally elongated head and body, a more  
126 ventrally flexed vertebral column, fewer bony processes caudal to the neurocranium, and a  
127 greater proportion of epaxial muscle than bluegill sunfish. The exaggerated ventral flexion of the  
128 vertebral column causes the neurocranium to have a depressed resting posture, which we expect  
129 increases its range of dorsoventral motion (Fig. 1). Additionally, the curvature may cause the  
130 axis of rotation of the neurocranium to be located more caudally (close to the vertebral column  
131 inflection point), which has also been correlated with greater neurocranial elevation (Jimenez et  
132 al., 2018). Compared to bluegill sunfish, royal knifefish have few bones immediately caudal to  
133 the neurocranium: no supraneurals or dorsal fin pterygiophores, and thin neural spines. We  
134 predict that this enables them to perform larger neurocranial elevation than bluegill sunfish.  
135 Lastly, while both royal knifefish and bluegill sunfish have dorsoventrally deep epaxial muscles,  
136 the transverse cross-section of the royal knifefish (forming an inverted teardrop) increases the  
137 epaxial muscle mass relative to the hypaxials (Fig. 1). Based on the body shape of the royal  
138 knifefish, we hypothesize that they rely predominantly on massive epaxial muscles and large  
139 neurocranial elevation to power suction feeding.

140         To test these hypotheses, we used XROMM to measure the 3D skeletal kinematics and  
141 instantaneous buccal volume of royal knifefish during suction feeding. Intraoral pressure was  
142 also measured simultaneously and combined with the rate of buccal volume change to calculate  
143 the suction power during royal knifefish strikes (Camp et al., 2015; Camp et al., 2020). Length  
144 changes were measured throughout the epaxial, hypaxial, and sternohyoid muscles during  
145 suction feeding using fluoromicrometry (Camp et al., 2016). Muscle shortening and post-mortem  
146 muscle mass were used to determine the roles and relative contributions of these muscles to  
147 suction power. These data allowed us to test if royal knifefish 1) have relatively large cranial  
148 elevation compared to previously studied species (bass, sunfish, and catfish) and 2)  
149 predominantly utilize epaxial muscle power when suction feeding. Determining how royal  
150 knifefish use their unusual postcranial morphology to power suction expansion provides a better  
151 understanding of the relationship between body shape and suction feeding biomechanics.

152

## 153 MATERIALS AND METHODS

154 Royal knifefish (*Chitala blanci*, d'Aubenton 1965) were acquired from Ocean State  
155 Aquatics, Coventry RI: Cb01 (standard length 35.6 cm, body mass 217 g), Cb03 (30.8 cm, 170  
156 g), and Cb04 (43.3 cm, 480 g). Royal knifefish were maintained on a diet of goldfish (*Carassius*  
157 *auratus*). All experimental procedures were approved by Brown University Institutional Animal  
158 Care and Use Committee.

159 The fish were anesthetized with a buffered MS-222 solution during surgical implantation  
160 of a buccal cannula for pressure measurement and radio-opaque bone and muscle markers.  
161 Implantation techniques were consistent with those previously reported (Camp and Brainerd,  
162 2014), and are described here in brief. One to five radio-opaque markers (tantalum spheres 0.50  
163 or 0.80 mm in diameter) were implanted into the neurocranium, the left and right ceratohyals and  
164 cleithra, and the left maxilla, lower jaw, suspensorium, and operculum (Fig. 2A,B). Cb04  
165 received bilateral lower jaw implantations. In all individuals, 0.80 mm tantalum beads were  
166 implanted superficially, slightly to the left of the mid-sagittal plane in the epaxial (five to nine  
167 markers), and sternohyoid musculature (two to three markers) (Fig. S1). Ventral muscles were  
168 marked in Cb01 (anal fin) and Cb04 (hypaxial) with three to five markers, with no ventral  
169 markers in Cb03. The dorsal column of epaxial musculature was implanted in Cb04 (three  
170 markers) (Fig. S1). Five to six muscle markers were used to define a body plane (Fig. S1).  
171 Following established methods, a cannula guide for the pressure transducer was implanted into  
172 the ethmo-frontal region of the neurocranium, avoiding the palatine and teeth, protruding just  
173 into the buccal cavity (Norton and Brainerd, 1993). All individuals received perioperative  
174 analgesic (butorphanol or ketoprofen) and Cb01 and Cb03 received an antibiotic (enrofloxacin).  
175 Fish were allowed to recover fully, i.e., resumed natural and aggressive feeding behaviors, before  
176 filming experiments began.

177

### 178 Data recording

179 All fish were trained to feed on live goldfish (approximately 3-5 cm total length) in  
180 custom-built acrylic aquaria with a feeding extension tunnel (75–100 mm wide, 300-400 mm  
181 long) designed to minimize the amount of water through which the X-ray beams must travel  
182 (Gidmark et al., 2012). See Movie S1 for a standard light video (recorded at 500 frames s<sup>-1</sup> and  
183 slowed down 16.7 times) of Cb04 feeding in a tunnel.

184 A custom biplanar X-ray system (Imaging Systems and Services, Painesville, OH, USA)  
185 was used to capture dorsoventral and lateral X-ray videos at 500 frames s<sup>-1</sup> with Phantom v10  
186 high-speed cameras (Vision Research, Wayne, NJ, USA) at 100 mA and 90-115 kV. Standard  
187 grid and calibration objects were used to remove distortion introduced by X-ray machines and to  
188 calibrate three-dimensional (3D) space (Brainerd et al. 2010). Intraoral pressure was  
189 simultaneously recorded with an SPR- 407 Mikro-tip pressure probe (Millar Instruments,  
190 Houston, TX, USA) inserted into the neurocranial cannula, recording at 1000 Hz with PowerLab  
191 and LabChart 7.2.2 (ADInstruments, Colorado Springs, CO, USA). Pressure transducer  
192 calibration was carried out daily by moving the probe through a 10 cm change in water depth  
193 while recording the voltage output. This model of probe provides linear pressure-voltage outputs  
194 over a pressure range of at least 0 to -60 kPa (Higham et al., 2006). Pressure data were collected  
195 for each strike and noise was filtered in R (2019, R Core Team, Vienna, Austria) using a low-  
196 pass, forward-backward (to remove phase shifts) Butterworth filter at a cutoff frequency of 200  
197 Hz. The pressure recording was initiated by the X-ray camera trigger and corrected for a mean  
198 measured lag of two milliseconds (range 1-3 ms) from the initial X-ray image. For three Cb03  
199 strikes, the initial X-ray images were missing, so to correctly align the pressure and video data,  
200 we averaged the time between peak pressure and peak rate of volume change for all Cb04 strikes  
201 and corrected the Cb03 image sequences to account for a pressure lag of two milliseconds.  
202 Feeding trials with the greatest subambient buccal pressure from each individual were chosen for  
203 analysis. A total of 23 recorded strikes (six from Cb01, seven from Cb03, ten from Cb04) were  
204 analyzed.

205 Computed tomography (CT) scans were taken of each fish after surgical implantation  
206 with a FIDEX CT Scanner (Animage, Pleasanton, CA, USA), with 480 × 480 pixel resolution  
207 and 0.173 mm slice thickness. From these scans, polygonal meshes of each bone and the radio-  
208 opaque markers were generated in Horos (v3.3.5; Horos Project; [horosproject.org](http://horosproject.org)) and edited in  
209 Geomagic 2014 (Research Triangle Park, NC, USA). Markers were imported into Autodesk  
210 Maya 2020 (San Rafael, CA, USA) and with custom scripts from ‘XROMM Maya Tools’  
211 package--available at [https://bitbucket.org/xromm/xromm\\_mayatools](https://bitbucket.org/xromm/xromm_mayatools)--their respective xyz (3D)  
212 coordinates were determined. Raw data for this study are publicly available and stored on the  
213 XMAPortal (<http://xmaportal.org>) in the study “Knifefish Suction Feeding,” with the permanent  
214 identifier BROWN65. Video data are stored with their essential metadata in accordance with  
215 best practices for video data management in organismal biology (Brainerd et al., 2017).

216

## 217 **XROMM animation**

218 For each of the three individual *C. blanci*, skeletal kinematics were reconstructed using  
219 marker-based XROMM with XMALab 1.5.5 (Knörlein et al., 2016; software and instructions  
220 available at <https://bitbucket.org/xromm/xmalab>) and custom XROMM MayaTools scripts.  
221 Markers from both X-ray videos were tracked in XMALab with a mean precision of 0.05 mm  
222 and maximum precision error of 0.1 mm across all trials (measured as the standard deviation of  
223 the unfiltered pairwise marker-to-marker distances within all rigid bodies). Marker coordinates  
224 were used to reconstruct the 3D motion of each bone using the ‘matools’ R package, following  
225 the XROMM workflow described in Olsen et al., 2019 (available under matools R package at  
226 <https://github.com/aaronolsen>). Briefly, all *xyz* marker coordinates were smoothed and, for bones  
227 containing three or more markers, 3D coordinates were combined with their respective CT  
228 coordinates (using the ‘unifyMotion’ function from ‘matools’) to produce rigid body  
229 transformations. These transformations were applied to the skeletal bone meshes in Maya (2020,  
230 Autodesk), producing a 3D XROMM animation of each suction feeding strike (Fig. 2A,B). For  
231 any bones with only two beads or those with a linear set of markers, virtual constraints were  
232 applied using the ‘matools’ R package in accordance with anatomical constraints (e.g.  
233 cartilaginous symphysis between the cranioventral region of the left and right cleithra, or  
234 ceratohyal retraction along the neurocranial mid-sagittal plane).

235 The body plane was animated with a set of five to six intramuscular axial markers in  
236 roughly the same location along the body for each individual. These markers were positioned  
237 near the most curved region of the vertebral column (Fig. S1). Their 3D coordinates were  
238 combined with their respective CT coordinates to generate a rigid body transformation using the  
239 ‘matools’ R package (Olsen et al., 2019). The body plane animation was included in the  
240 XROMM animations mentioned above.

241

## 242 **Skeletal kinematics**

243 Six-degree-of-freedom motions of the neurocranium and left cleithrum were measured  
244 relative to the body plane. These rotations were measured with a joint coordinate system (JCS),  
245 which measures the relative rotations of two anatomical coordinate systems (ACSs), one  
246 attached to the bone and the other to the body plane (Camp and Brainerd, 2014; Camp et al.,  
247 2018). Each JCS measured translation and Euler angle rotations about the x-, y-, z- axis,



248 following the right-hand rule and  $zyx$  order of rotation. The JCS used to measure neurocranial  
249 motion was placed at the craniovertebral joint and the JCS to measure cleithral motion was  
250 placed at the dorsal tip of the cleithra. Both sets of JCSs were aligned with the z-axis oriented  
251 mediolaterally, y-axis rostrocaudally, and the x-axis dorsoventrally. Z-axis rotations were  
252 standardized to start at 0 deg by subtracting their value at the start of each strike. Positive  
253 rotation about the z-axis reflects dorsal rotation in the sagittal plane, corresponding to  
254 neurocranial elevation or cleithral protraction. Rotations about the z-axis also reflect dorsoventral  
255 motions of the cranial vertebrae, as these impact the position and motion of the body plane.

256

### 257 **Dynamic endocast**

258 Following previously established methods, changes in buccal cavity volume were  
259 measured from XROMM animations using a dynamic endocast (Camp et al., 2015; Camp et al.,  
260 2020). In brief, a polygonal mesh endocast of the left side of the buccal cavity was generated  
261 using locators attached to the inside surface of cranial bones. Additional locators were placed  
262 between bones to define the ventral border of the buccal cavity, i.e., the sternohyoid and  
263 protractor hyoideus muscles, and the mid-sagittal plane dividing the left and right sides of the  
264 buccal cavity. The 3D coordinates of the locators were imported into MATLAB (R2020a;  
265 MathWorks, Natick, MA, USA) and custom-written scripts (available at  
266 <https://bitbucket.org/ArielCamp/dynamicendocast>) were used to generate the volume enclosing  
267 the locators and calculate its volume, for each frame. For each frame, the volume was generated  
268 from the xyz coordinates of the locators using an alpha shape: a method of fitting or “wrapping”  
269 3D points with a 3D shape (Edelsbrunner et al., 1983). Alpha shapes are a generalization of  
270 convex hulls that allow the fineness of fit to be varied by changing the alpha value and allows the  
271 shape to include concave curvatures. The volumes were generated using the ‘alphashape’  
272 function in MATLAB, and an alpha value of 3 was found to provide the best fit, i.e., endocasts  
273 fully filled the mouth cavity with minimal interpenetration of the bone models. Polygonal  
274 meshes (.obj files) of the volumes of the left side of the buccal cavity were then imported into  
275 Maya for visual verification (Fig. 2E,F). Under assumptions of bilateral cranial symmetry, the  
276 left mesh volume was doubled to calculate bilateral buccal volume expansion.

277

### 278 **Muscle length changes**

279           Sternohyoid and axial muscle length changes were measured from X-ray videos as the  
280 distance between intramuscular markers, i.e., by fluoromicrometry (Camp et al., 2016). Muscle  
281 markers were tracked in XMALab and their coordinates were filtered in R with ‘matools’ as  
282 described above. The distance between muscle markers was subsequently calculated in R to  
283 determine the magnitude and distribution of sternohyoid, epaxial, and hypaxial muscle  
284 shortening. To capture muscle shortening in the cranialmost region of the epaxial muscle and the  
285 dorsal column of Cb04, the distance was measured between the first marker in the muscle region  
286 and a locator placed at the cranialmost neurocranium-epaxial muscle attachment site of the  
287 animated neurocranium model in Maya. Distance in the cranialmost hypaxial region was  
288 calculated between the first hypaxial muscle marker and a locator attached to the cleithra, placed  
289 in line with the hypaxial muscle bead set (Fig. S1). Since the entire marker set was not  
290 consistently within the X-ray imaging volume, axial muscle length was measured from a subset  
291 of axial muscle markers that were visible in almost all strikes. This set of markers extended  
292 approximately 7-9 cm caudal of the craniovertebral joint: from the neurocranium to as far back  
293 as a few centimeters cranial of the dorsal fin (Fig. S1). Within this region, fluoromicrometry was  
294 used to estimate the muscle lengths of subregions along the length of the body by measuring  
295 distance between adjacent pairs of intramuscular markers.

296           For the axial muscles, whole-muscle length was calculated by taking the sum of the  
297 subregional muscle lengths, originating with the cranialmost locator and extending to the  
298 caudalmost visible muscle marker. In the sternohyoid, all implanted markers were visible, and its  
299 measurements are reported as whole-muscle length. Muscle length at each time step was  
300 normalized by the mean initial length measured at the first recorded frame of each strike ( $L_i$ ),  
301 with values less than one representing that the muscle had shortened. Muscle velocity was  
302 similarly calculated at each time as the change in normalized muscle length divided by the  
303 change in time, denoted by  $L_i \text{ s}^{-1}$ , with positive values representing muscle shortening. Note that  
304 this method for determining axial muscle strain differs slightly from other suction power studies,  
305 in that we used the sum of the subregional muscle lengths, whereas prior papers used the  
306 distance from the neurocranium or cleithrum to the caudalmost axial muscle marker (Camp et al.,  
307 2015; Camp et al., 2018; Camp et al., 2020). The summation method recorded more consistent  
308 levels of epaxial muscle shortening in *C. blanci*, likely due to its ability to capture the length of  
309 the naturally flexed epaxial musculature at rest.

310

## 311 **Power calculations**

312 Instantaneous suction power was calculated in R as the product of rate of volume change  
313 and intraoral pressure as described in Camp et al. (2015). Before calculating rate of volume  
314 change, bilateral buccal volume measurements from the dynamic endocast were filtered with a  
315 low-pass, forward-backward Butterworth filter (150 Hz cutoff) to reduce noise generated by  
316 frame-to-frame polygonal mesh re-triangulations. Buccal pressure was downsampled from 1000  
317 Hz to 500 Hz to match the frequency of the volume data. Pressure data were calculated relative  
318 to initial, ambient pressure prior to the strike and multiplied by -1, so that at each time step, the  
319 product of subambient pressure and increasing rates of volume change would reflect positive  
320 power (Fig. 3).

321 For each strike, axial and cranial mass-specific power were calculated by dividing the  
322 maximum instantaneous power by the mass of the respective muscle groups. Muscle masses  
323 were determined by post-mortem dissection of the muscle regions on the right side of the fish,  
324 weighed on a digital scale, and then doubled to estimate bilateral muscle mass for all individuals  
325 except Cb03. The body of Cb03 was unavailable for dissection, so muscle masses are estimates  
326 determined by averaging the percent of muscle mass for each muscle of Cb01, Cb04, and an  
327 additional individual, Cb02, and assuming proportionality based on overall body mass across  
328 individuals (Table 1). The total body mass, and bilateral epaxial, hypaxial, dorsal column,  
329 sternohyoid, and cranial muscle masses from Cb02 were 0.393 kg, 0.103 kg, 0.066 kg, 0.002 kg,  
330 0.0032 kg, and 0.0054 kg respectively (values for other individuals are reported in Table 1). In  
331 accordance with previous XROMM studies, epaxial muscle mass included all of the epaxial  
332 musculature dorsal to the vertebral column and about 60-70% along the length of the body, based  
333 on the extent of shortening identified (Camp and Brainerd, 2014; Camp et al., 2018; Camp et al.,  
334 2020; Jimenez and Brainerd, 2020; Jimenez et al., 2021). Note that this method differs from prior  
335 studies, which only included epaxial musculature dorsal to the cleithrum-supracleithrum joint,  
336 and which reported lower percentages of epaxial muscle mass in bluegill sunfish and largemouth  
337 bass (Carroll, 2004; Carroll and Wainwright, 2009). Axial mass-specific power was calculated  
338 by dividing instantaneous power by the sum of the epaxial, hypaxial, and dorsal column muscle  
339 mass. Cranial mass-specific power was calculated by dividing instantaneous power by the  
340 combined mass of the levator arcus palatini, dilator operculi, levator operculi, and sternohyoid  
341 muscles. Muscle mass-specific power was determined by dividing the maximum instantaneous  
342 power by the total mass of the muscle regions (epaxial, hypaxial, and sternohyoid muscle)

343 shortening during suction expansion (Fig. 3). These mass-specific values represent the estimated  
344 amount of power each group of muscles would need to output if they were the sole contributors  
345 to suction feeding expansion.

346 The dynamic endocast volume and buccal pressure measurements do introduce sources of  
347 error in the suction power estimates, as described in Camp et al. (2018). In brief, absolute  
348 volume measurements are overestimates, since they do not account for the presence of soft tissue  
349 or internal structures. However, the volume of these structures is consistent throughout the strike  
350 and should have little effect on the calculations for rate of volume change and subsequent power  
351 calculations. Rapid re-triangulation of dynamic endocast polygonal meshes may cause increased  
352 recorded rates of volume change, however, a low-pass, forward-backward Butterworth filter with  
353 a high cutoff frequency over the endocast buccal volume trace may produce underestimates of  
354 the actual rate of volume change. The intraoral pressure cannula only provides pressure readings  
355 at one location within the buccal cavity and does not capture variations in pressure during  
356 suction feeding (Muller et al., 1982; Van Wassenbergh, 2015). These estimates are likely  
357 underestimates of subambient pressure, since modeling of clariid catfishes and bluegill sunfish  
358 (Van Wassenbergh et al., 2015) and *in vivo* measurements (Tegge et al., 2020) suggested that  
359 highest subambient pressure occurred more caudally in the buccal cavity (Van Wassenbergh et  
360 al., 2005; Van Wassenbergh et al., 2006b). Additionally, our power calculations do not account  
361 for the forces required to overcome inertia or drag (Van Wassenbergh et al., 2015), yet studies of  
362 clariid catfishes and largemouth bass indicate that these forces are likely small compared to that  
363 required to overcome subambient pressure (Van Wassenbergh et al., 2005; Van Wassenbergh et  
364 al., 2015). Therefore, our values for instantaneous suction power are most likely to be  
365 underestimates.

366

### 367 **Determining peak gape**

368 Suction feeding power, muscle shortening, and skeletal kinematics were all measured  
369 relative to the time of peak gape. Gape distance was measured as the distance between virtual  
370 locators on the rostralmost tips of the lower jaw and premaxilla. Peak gape is defined here as the  
371 maximum gape distance directly following the rapid increase in gape during the start of the  
372 strike. We calculated this by identifying the first frame at which there is a major change in the  
373 inflection of the gape distance curve from increasing to decreasing or in some cases minimal  
374 increasing. By taking the derivative of gape distance over time, we used 10% of the maximum

375 rate of gape change as a threshold to isolate the first time point when the rate of gape change was  
376 below the threshold (Fig. S2). This method for determining peak gape differs from other suction  
377 power studies (Camp et al., 2015; Camp et al., 2018; Camp et al., 2020), but was chosen because  
378 of the high variability of gape distance traces in royal knifefish, e.g., gape curves with multiple  
379 peaks (double-strikes) or initial strikes followed by slow gradual gape expansion (slowly  
380 increasing plateau). Selecting the initial peak gape frame using the first instance of major  
381 inflection in gape distance yielded substantially better consistency of alignment of the expansion  
382 part of the gape cycle in this study (Fig. S2).

383

## 384 **RESULTS**

385 In our study, royal knifefish were capable of generating very high suction power (Fig. 4).  
386 The neurocranium reached high magnitudes of elevation during the period of peak power (Fig.  
387 5). Similarly, the epaxial muscle generated high strain and shortening velocity, reaching its  
388 shortest length during the period of peak power, and the sternohyoid shortened consistently  
389 across all strikes (Fig. 5). In addition, muscle mass-specific power was unusually high in the  
390 highest power strikes, reaching  $535 \text{ W kg}^{-1}$  in Cb03 and  $800 \text{ W kg}^{-1}$  in Cb04 (Fig. 4).

391

### 392 **Inter-individual variation**

393 Cb04 produced substantially higher power strikes than Cb01 and Cb03 (Fig. 4). The  
394 mean peak power for Cb04 was 15 times greater than Cb01 and 6 times greater than Cb03 with  
395 the most powerful strikes reaching 13.5 W for Cb01, 38.0 W for Cb03, and 163.3 W for Cb04.  
396 The substantially larger suction power in Cb04 resulted from both greater subambient buccal  
397 pressure and faster rate of buccal volume change (Table 1). In Cb04, mean peak subambient  
398 pressure was approximately 5.6 times greater than that of Cb01 and nearly 3 times greater than  
399 that of Cb03, and mean peak rate of volume change was approximately 3 times greater than  
400 Cb01 and Cb03 (Table 1). Unlike Cb04, the difference in suction power between Cb01 and Cb03  
401 was largely due to the difference in mean peak subambient buccal pressure, which was nearly  
402 two times larger in Cb03 compared to Cb01 (Table 1). Because of these differences among  
403 individuals, results are reported separately for each individual, with means and s.e.m. (Table 1).

404

### 405 **Skeletal kinematics**

406           The neurocranium consistently elevated (rotated dorsally) relative to the body plane,  
407 across all strikes in all individuals (Fig. 5). During suction expansion, as the vertebral column  
408 extended from curved to straight, the cranialmost vertebrae elevated with the neurocranium (Fig.  
409 2A,B). Due to placement of our body plane, the neurocranium JCS captures a combination of  
410 neurocranium elevation at the craniovertebral joint and vertebral column extension. While the  
411 magnitude of rotation was sensitive to location of the body plane, the neurocranium and anterior  
412 vertebral column elevated notably and consistently in all three individuals regardless of the body  
413 plane's location. The mean maximum elevation measured during the period of peak power was  
414  $17.0 \pm 3.6$  deg for Cb01,  $26.9 \pm 4.9$  deg for Cb03, and  $27.9 \pm 1.7$  deg for Cb04. For some strikes,  
415 the neurocranium showed a pattern of initial elevation, slight depression, and then continued  
416 elevation at the end of pectoral girdle retraction. The initial phase of neurocranial elevation  
417 occurred during the period of peak power (shown in red in Fig. 5) and during epaxial muscle  
418 shortening (Fig. 5).

419           Cleithral retraction (caudoventral rotation) relative to the body plane was consistent  
420 within Cb04 strikes, but highly variable in Cb01 and Cb03 (Fig. 5). During Cb04 strikes, the  
421 cleithrum initially protracted (craniodorsal rotation), followed by the start of retraction prior to  
422 the period of peak power, and a steady, continued retraction through the period of peak power  
423 (Fig. 5). It should be noted that cleithral protraction occurs relative to the body plane; the cleithra  
424 are not protracting relative to the neurocranium but are instead being pulled dorsally by vertebral  
425 column extension, causing hypaxial lengthening. Maximum cleithrum retraction in Cb04  
426 averaged  $-3.1 \pm 0.6$  deg during the period of peak power and increased to an average of  $-6.4 \pm$   
427  $0.5$  deg after the period of peak power. Cb01 and Cb03 showed variability in timing and did not  
428 always retract during the period of peak power in their strikes. The magnitude of cleithral  
429 protraction and retraction was also highly variable in Cb01 and Cb03 (Fig. 5), with mean peak  
430 retractions of  $-3.0 \pm 2.7$  deg and  $0.8 \pm 3.0$  deg, respectively, during the period of peak power.

431

### 432 **Muscle length changes and muscle power**

433           The epaxial and sternohyoid muscles consistently shortened prior to and during peak  
434 power in all individuals (Fig. 5). However, the magnitude and pattern of epaxial shortening  
435 varied across individuals. Epaxial muscles shortened across all of the measured subregions in  
436 Cb03 and Cb04, and all but the caudalmost subregion of Cb01 (Fig. 6). Mean peak whole-muscle  
437 strain in the epaxials during the period of peak power was similar between Cb04 and Cb03 ( $8.0 \pm$

438 0.7 %  $L_i$  and  $7.9 \pm 1.4\%$   $L_i$ , respectively), as was mean peak muscle shortening velocity during  
439 the period of peak power ( $4.7 \pm 0.1 L_i s^{-1}$  and  $4.6 \pm 1.5 L_i s^{-1}$ , respectively). Epaxial strains  
440 during the period of peak power were lower in Cb01, less than half that of Cb03 and Cb04  
441 (Table 1). Mean peak epaxial strain during the period of peak power was lowest in the  
442 cranialmost region (below 5% strain in all individuals) and the highest at approximately one-half  
443 to three-fourths of the distance between the craniovertebral joint to the dorsal fin (3-6 cm, 4-7  
444 cm, and 6-8 cm caudal of the craniovertebral joint in Cb01, Cb03, and Cb04, respectively) (Fig.  
445 6; Fig. S1).

446 Similar shortening behaviors were seen in the dorsal column of muscle of Cb04, the only  
447 individual with beads implanted in this muscle (Fig. S3). This column of muscle is dorsal to and  
448 separate from the epaxial. It inserts on the neurocranium and extends along the length of the  
449 body. The dorsal column of Cb04 shortened at the same time as the corresponding region of the  
450 epaxial muscle (three cranialmost subregions), reaching  $5.8 \pm 0.4\%$   $L_i$  strain and muscle  
451 shortening velocity of  $3.4 \pm 0.1 L_i s^{-1}$  (Fig. S3). The caudalmost subregion showed the greatest  
452 magnitude of strain.

453 In the hypaxial musculature of Cb04, a consistent pattern of lengthening then shortening  
454 prior to the period of peak power occurred in all recorded strikes (Fig. 5). Early lengthening  
455 across the full extent of the marked hypaxial muscle was so great in Cb04 that, during peak  
456 power, it shortened with a mean peak velocity of  $4.1 \pm 0.1 L_i s^{-1}$ , while the muscle length was  
457 still longer relative to its initial length ( $-1.1 \pm 0.4\%$   $L_i$ ) (Table 1). The caudalmost subregion of  
458 the hypaxial muscle shortened during the period of peak power, while the cranialmost subregions  
459 lengthened (Fig. 6). Unlike Cb04, ventral muscle beads in Cb01 were implanted in the anal fin  
460 musculature, and no beads were implanted in the hypaxial muscle of Cb01 or Cb03 (Fig. S1).  
461 The shortening patterns and strain of the ventral muscle beads in Cb01, during the period of peak  
462 power, were highly variable ( $1.8 \pm 2.8\%$   $L_i$ ) (Fig. 5, Table 1).

463 The sternohyoid shortened with a consistent pattern in all strikes and across individuals,  
464 with mean strains of 2.5-2.7% during the period of peak power (Table 1, Fig. 5). Sternohyoid  
465 shortening began prior to and continued through the period of peak power, with higher  
466 shortening velocities occurring during peak power. Magnitudes of strain in the sternohyoid were  
467 similar across individuals, but sternohyoid shortening velocity during the period of peak power  
468 was up to two times higher in Cb04 and Cb03 compared to Cb01 (Table 1).

469 Royal knifefish generated high muscle mass-specific power, which we calculated by  
470 dividing the maximum instantaneous suction power of each strike by the total mass of  
471 musculature shortening during peak power generation (epaxial, hypaxial and sternohyoid). For  
472 these muscles (0.2035 kg combined for Cb04) to produce the highest power strike recorded  
473 (163.3 W), they would have needed to generate  $802.5 \text{ W kg}^{-1}$  of power. The next three highest  
474 power strikes recorded for Cb04 are estimated to have required  $628.0 \text{ W kg}^{-1}$ ,  $565.0 \text{ W kg}^{-1}$ , and  
475  $545.0 \text{ W kg}^{-1}$ . The maximum peak muscle power in Cb01 was much lower ( $164.2 \text{ W kg}^{-1}$ ), but  
476 the muscle power in the highest power strike in Cb03 ( $535.3 \text{ W kg}^{-1}$ ) was within the range of  
477 muscle power generated across all Cb04 trials ( $289.3 \text{ W kg}^{-1} - 802.5 \text{ W kg}^{-1}$ ).

478

## 479 **DISCUSSION**

480 The massive epaxial muscles of royal knifefish account for >25% of body mass and  
481 during suction feeding they shortened considerably and rapidly, generating large neurocranial  
482 elevation and vertebral extension. These results agree with our predictions based on body shape  
483 and postcranial morphology. During the most powerful strikes, the hypaxials also shortened and,  
484 together with the epaxials, generated over 95% of the power for suction expansion with muscle  
485 power output of up to  $800 \text{ W kg}^{-1}$ . The magnitude of sternohyoid muscle shortening was  
486 consistent across all strikes, while the magnitude of axial muscle shortening was more variable  
487 during lower power strikes. This suggests that the sternohyoid muscle may contribute a greater  
488 proportion of power in lower power strikes. Likely driven by their large neurocranial elevation  
489 and rapid epaxial shortening, royal knifefish generated much higher rates of buccal expansion,  
490 subambient intraoral pressure, and suction power than those previously measured in other  
491 species (Table 2). For the purpose of this discussion, we will compare the highest performing  
492 individuals, using them as a proxy for the relative capabilities of each species (see *Variation in*  
493 *suction power* section).

494

### 495 **Epaxial muscle shortening and neurocranial elevation**

496 During suction feeding, royal knifefish substantially elevated their neurocranium and  
497 cranialmost vertebrae, fully straightening their vertebral column (Fig. 2). Mean maximum  
498 neurocranial elevation during the period of peak power in royal knifefish exceeded the mean  
499 maximum neurocranial elevation values previously measured in largemouth bass, bluegill  
500 sunfish, and channel catfish (Table 2). The highest values of neurocranial elevation during the



501 period of peak power recorded in each royal knifefish individual (28-42 deg) were within the  
502 range observed in Commerson's frogfish (*Antennarius commerson*), a genus known for its  
503 exceptionally large suction expansion (Camp, 2021; Longo et al., 2016). Our results are  
504 consistent with the predictions that a combination of the initially depressed neurocranium and  
505 ventrally flexed vertebral column increased the range of neurocranial motion used during suction  
506 feeding. Interestingly, these are anatomical traits shared by the frogfish (Camp, 2021) but not all  
507 species with extremely high cranial elevation (Lauder and Liem, 1981; Van Wassenbergh et al.,  
508 2008).

509 In royal knifefish, the epaxial musculature shortened along at least 60-70% of the body  
510 length, with high strain and shortening velocity. When comparing the highest performing  
511 individual of each species, the mean peak epaxial muscle strain during the period of peak power  
512 of royal knifefish was approximately two times the absolute peak epaxial strain (which occurred  
513 after the period of peak power) of largemouth bass and bluegill sunfish (Table 2). Similarly, the  
514 mean peak epaxial shortening velocity during the period of peak power was more than two times  
515 higher in the highest performing individual in royal knifefish than in largemouth bass and  
516 bluegill sunfish (Table 2). While the maximum shortening velocity ( $V_{\max}$ ) for royal knifefish  
517 epaxials is unknown,  $V_{\max}$  for largemouth bass has been measured as  $11 L_i s^{-1}$  (Coughlin and  
518 Carroll, 2006), with  $3-4 L_i s^{-1}$  as the range expected for optimal power output. Epaxial shortening  
519 velocity during the period of peak power in the highest performing royal knifefish was  $4-5 L_i s^{-1}$ ,  
520 suggesting that the epaxials may be shortening at or near the range for optimal power output.

521

## 522 **Hypaxial muscle shortening and cleithral retraction**

523 In Cb04, the cleithrum consistently protracted then retracted, while the hypaxial muscles  
524 lengthened then shortened. Cleithral protraction and hypaxial lengthening corresponded to the  
525 start of neurocranial elevation and vertebral column extension, which likely pulled rostro-  
526 dorsally on the cleithrum relative to the body plane, substantially lengthening the hypaxials. This  
527 pattern of cleithral protraction and hypaxial lengthening prior to cleithral retraction and hypaxial  
528 shortening has not been observed in ray-finned fishes previously studied with XROMM.  
529 Although this rostro-dorsal motion was measured as cleithral protraction, the cleithrum did not  
530 appear to protract relative to the neurocranium and we did not observe a reduction in buccal  
531 volume. Because the vertebral column remained partially extended after peak extension,  
532 shortening of the hypaxials back to just their initial length still retracted the cleithrum, on

533 average,  $-6.4 \pm 0.2$  deg past its initial position (Fig. 5). Compared to the highest performing  
534 individual of each species, royal knifefish had greater mean peak hypaxial shortening velocity  
535 during the period of peak power than bluegill sunfish and more than 2.5 times that of largemouth  
536 bass and channel catfish (Table 2).

537 While the ventral muscle markers in Cb01 were implanted ventral to the hypaxial muscle,  
538 in the anal fin muscle (Fig. S1), the muscle length traces seemed to align with the cleithral  
539 retraction patterns as in Cb04 (Fig. 5). This suggests that anal fin data may still be reflective of  
540 hypaxial strain, but possibly more variable in lower power strikes.

541

### 542 **Relative contributions of the epaxial and hypaxial muscles**

543 Our results suggest that the epaxial muscles are generating a greater portion of suction  
544 power than the hypaxial muscles in royal knifefish. First, mean epaxial muscle mass was 1.8  
545 times greater than the hypaxial muscle mass, and so was capable of greater power output (Table  
546 1). Second, in Cb01 and Cb03, cleithrum retraction—and presumably hypaxial shortening—were  
547 inconsistent, while neurocranial elevation and epaxial shortening were large and consistent (Fig.  
548 5; Table 1). Although Cb04 used consistent cleithral retraction and hypaxial shortening, the  
549 magnitude and speed of hypaxial strain was less than half of epaxial strain (Table 1, Table 2).  
550 These data support the conclusion that the hypaxial muscles contributed less power, less  
551 consistently to suction expansion than the epaxial muscles.

552

### 553 **Sternohyoid muscle shortening and contributions to suction power**

554 The timing and magnitude of sternohyoid shortening were relatively consistent across all  
555 strikes, irrespective of suction power and individual. All individuals had similar mean  
556 magnitudes of peak strain during the period of peak power, within 2.5-2.7 %  $L_i$  (Table 1). The  
557 sternohyoid shortened during the period of peak power and is electrically active during feeding  
558 strikes in congeneric species (Sanford and Lauder, 1989), which suggests that it actively  
559 contributed power to buccal cavity expansion. Consistent sternohyoid shortening similarly  
560 occurred during buccal cavity expansion in channel catfish, bluegill sunfish, striped surfperch  
561 (*Embiotoca lateralis*), and one clariid catfish (Camp et al., 2018; Camp et al., 2020; Lomax et  
562 al., 2020; Van Wassenbergh et al., 2007a). By contrast, in largemouth bass and several clariid  
563 catfishes, the sternohyoid did not shorten (or lengthen) during rapid suction expansion but rather  
564 acted as a stiff ligament that transmitted power from hypaxial musculature to produce hyoid

565 depression (Camp and Brainerd, 2014; Van Wassenbergh et al., 2007a). Because the sternohyoid  
566 did not lengthen in royal knifefish, it also transmitted power generated from hypaxial shortening  
567 to facilitate hyoid depression and buccal expansion. This suggests that the sternohyoid has a dual  
568 function in royal knifefish, both transmitting power from the hypaxial muscle and generating  
569 power by shortening during the period of peak power.

570         The consistent pattern of sternohyoid shortening across all individuals suggests that the  
571 sternohyoid muscle may provide a greater proportion of muscle power in low performance  
572 strikes. To generate the suction power for the highest recorded strike in Cb04, we estimated that  
573 the musculature would need to generate  $802.5 \text{ W kg}^{-1}$ . At this maximum muscle mass-specific  
574 power the sternohyoid in Cb04 (0.0046 kg) would be able to generate 3.7 W, which is within the  
575 range of the lowest power strikes recorded in Cb01 and Cb03. Similarly, the sternohyoid in Cb01  
576 (0.002 kg) could produce up to 1.6 W of power, which is more than is necessary for suction  
577 expansion in the lowest power strike (1.1 W) from Cb01. It is still unlikely that the sternohyoid  
578 is the sole contributor since the neurocranium elevates and the epaxials shorten to some degree in  
579 all strikes (Fig. 5). Instead, the sternohyoid may make a greater contribution to generating  
580 suction power when epaxial shortening is low and hypaxial muscle shortening is inconsistent, as  
581 observed in Cb01 (Fig. 5). These results suggest that high power strikes depend nearly  
582 exclusively on axial muscle shortening, whereas a greater proportion of muscle power may come  
583 from the sternohyoid muscle in lower power strikes.

584

### 585 **Variation in suction power**

586         Royal knifefish are capable of generating very high suction power, but we observed a  
587 wide range of power across the three individuals. Cb04 produced substantially higher power  
588 strikes, with mean peak suction power more than 15 times greater than Cb01 and 6 times greater  
589 than Cb03 (Fig. 4). The higher performance of Cb04 is partially explained by its body mass  
590 being more than twice the masses of Cb01 and Cb03 (Table 1), providing more muscle mass for  
591 power generation. When normalizing for body mass, there was substantial overlap in the mass-  
592 specific power in Cb03 and Cb04 (Fig. 7B), despite the non-overlapping ranges in absolute  
593 suction power (Fig. 7A). Additionally, it is possible that larger individuals generate more power  
594 per unit muscle mass if muscle power scales with positive allometry in royal knifefish as in other  
595 fish species (Carroll et al., 2009; Van Wassenbergh et al., 2007b). These features account for

596 some of the variation between Cb03 and Cb04, suggesting that Cb04 may not merely be an  
597 exceptional individual.

598         However, body size does not completely explain intraspecific variation in power. While  
599 Cb03 had the smallest total body mass (78% of that of Cb01), it generated more than double the  
600 mean peak intraoral pressure and mean peak power compared to Cb01 (Fig. 4, Table 1).  
601 Interestingly, Cb01 and Cb03 had the same mean peak rate of buccal volume change. These  
602 results reflect that there is not a simple relationship between buccal volume change, intraoral  
603 pressure, and power, but instead a complex interaction between multiple factors, including gape  
604 size (morphologically and throughout the strike), initial buccal volume, magnitude of buccal  
605 volume change, timing of peak rate of buccal volume change, and timing of peak buccal cavity  
606 expansion (Van Wassenbergh et al., 2005; Van Wassenbergh et al., 2006a; Van Wassenbergh et  
607 al., 2006b). Motivation almost certainly contributed to this variation as well. Despite efforts to  
608 standardize prey type, prey size, and training, Cb04 responded better to training, was less timid  
609 when feeding in front of researchers, and was highly food motivated.

610         The variation among royal knifefish individuals is similar to what has been observed in  
611 bluegill sunfish, largemouth bass, and channel catfish. In all of these species, the highest  
612 performing individual generated mean body mass-specific suction power that was 2.0-2.6 times  
613 higher than the second highest performing individual (Camp et al., 2015; Camp et al., 2018;  
614 Camp et al., 2020). In addition, wide ranges of maximum suction power, intraoral pressure, and  
615 buccal volume change were observed, even when accounting for body or buccal volume size.

616         Both the present study and previous suction power studies are unlikely to have captured  
617 the maximum performance of any of these species, given the difficulty of eliciting maximum  
618 performance in lab-based studies with artificial environments and small sample sizes (Astley et  
619 al., 2013). Therefore, even the highest power strikes, such as those of Cb04, are conservative  
620 estimates of the suction power capacity of these species. Without having captured the true  
621 maxima of each species, conclusions from interspecies comparisons can only be drawn from the  
622 data that has been collected. Thus, while royal knifefish suction expansion appears impressively  
623 powerful compared to previously measured species, it is difficult to directly compare suction  
624 power capacity across species.

625         Within these limitations, comparing the data from the four species studied to date is a  
626 useful first step in exploring suction power across teleost fishes. When comparing across species,  
627 it may be most appropriate to compare high performing individuals to each other and lower

628 performing individuals to each other. Within that context, all royal knifefish individuals  
629 outperformed largemouth bass, channel catfish, and bluegill sunfish individuals: Cb01 and Cb03  
630 outperformed the lower performing individuals, just as Cb04 outperformed the highest  
631 performing individuals of those species (Fig. 7).

632

### 633 **Suction power, intraoral pressure, and buccal expansion**

634 Royal knifefish generated higher suction power than the other species studied to date by  
635 producing both a greater magnitude of subambient intraoral pressure and a greater speed of  
636 buccal expansion (Camp and Brainerd, 2022). Of the four species, the mean peak intraoral  
637 pressure was greatest in royal knifefish, followed by bluegill sunfish, channel catfish, and  
638 largemouth bass (Table 2). Prior studies have not found consistent effects of body size on  
639 subambient buccal pressure, so we do not scale pressure here for body size (Carroll et al., 2004;  
640 Carroll et al., 2009). However, it is unclear how best to compare the rate of volume change  
641 among different sized individuals. If we simply compare the raw values across the highest  
642 performing individual within each species, the mean peak rate of buccal volume change was  
643 greatest in royal knifefish, more than 2.5 times that of largemouth bass and channel catfish, and  
644 more than 6.5 times that of bluegill sunfish (Table 2). If we normalize by body mass across the  
645 highest performing individual within each species, the mean peak body mass-specific rate of  
646 buccal volume change was still greater in royal knifefish, more than double that of bluegill  
647 sunfish and largemouth bass and almost five times that of channel catfish (Table 2). Thus, in  
648 comparison to the species previously studied with XROMM, the highest performing royal  
649 knifefish individual generated greater mean power by expanding its buccal cavity two times  
650 faster, relative to body mass, and generating at least 1.3 times greater buccal pressure magnitude.

651 Among the highest performing individuals of each species, royal knifefish generated a  
652 mean peak suction power approximately 8 times greater than channel catfish and bluegill sunfish  
653 and 13 times greater than largemouth bass (Fig. 7A; Table 2). When suction power was  
654 normalized by body mass or by maximum change in buccal volume—the difference between the  
655 volume of maximum buccal expansion and initial volume—then royal knifefish still  
656 outperformed the other three species but are more similar to bluegill sunfish (Fig. 7B,C).

657

### 658 **Muscle mass-specific power**

659 For high performance strikes, royal knifefish depend on the axial musculature shortening  
660 at high velocities to produce large neurocranial elevation and rapid buccal expansion. At least  
661 96.4% of the power for the highest power strike from Cb04 must have come from the axial  
662 musculature, based on the relative masses of the head and body muscles. If the major cranial  
663 muscles in Cb04 (sternohyoid, 4.6 g; levator arcus palatini, 1.64 g; levator operculi, 1.04 g;  
664 dilator operculi, 0.024 g) operated at the maximum muscle mass-specific power observed (802.5  
665 W kg<sup>-1</sup>), the cranial muscles could generate 5.9 W of power. For Cb04, 5.9 W is just 3.6% of the  
666 maximum suction power and 4.6-5.3% of the next three highest power strikes. These results are  
667 consistent with the findings of previous studies, which have shown that cranial muscles are only  
668 capable of contributing a small proportion of the power necessary for high performance suction  
669 feeding and that the axial muscles are the primary source of suction power (reviewed in Camp  
670 and Brainerd, 2022).

671 Although we expected that royal knifefish would depend on their axial muscles to  
672 generate high power strikes, we did not expect the axial muscles to operate at such high muscle  
673 mass-specific power in the most powerful strikes. Compared to mean muscle mass-specific  
674 power outputs of the highest performing largemouth bass (74.2 ± 13.2 W kg<sup>-1</sup>), bluegill sunfish  
675 (267.0 ± 49.2 W kg<sup>-1</sup>), and channel catfish (96.4 ± 20.1 W kg<sup>-1</sup>), Cb04 achieved a greater mean  
676 muscle mass-specific power output of 494.3 ± 51.6 W kg<sup>-1</sup> (Table 2), with a maximum of 802.5  
677 W kg<sup>-1</sup>. This maximum muscle mass-specific power output is near or potentially beyond the  
678 expected limits for vertebrates (Altringham et al., 1993; Askew and Marsh, 2001; Curtin et al.,  
679 2005), suggesting several possible explanations: 1) we overestimated suction power; 2) we  
680 underestimated the longitudinal extent of the axial musculature that is contributing suction  
681 power; 3) there is power amplification, in which the muscle shortens before the skeletal elements  
682 begin to move, thereby loading serial elastic elements that release their energy while the muscle  
683 continues to contract as the bones move (Astley and Roberts, 2012).

684 In considering this first explanation, our suction power estimates are conservative  
685 because we measured buccal pressure in one rostral location and hydrodynamic modeling has  
686 shown that pressure can be even more subambient in the caudal buccal cavity (Van  
687 Wassenbergh, 2015). For the second, we dissected and included the mass of nearly 75% of the  
688 total epaxial and hypaxial length (Fig. S1), extending more caudally than our implanted marker  
689 set in order to provide a generous muscle mass estimate. The third possibility is power  
690 amplification, as is seen in the epaxial musculature of pipefishes and seahorses (Van

691 Wassenbergh et al., 2008; Van Wassenbergh et al., 2014). This is an exciting potential  
692 explanation, but our results do not support this hypothesis. If power amplification were to create  
693 a catapult-like mechanism, we would expect to see gradual muscle shortening prior to the  
694 beginning of the strike to store elastic energy in the muscle and connective tissues (Astley and  
695 Roberts, 2012; Van Wassenbergh et al., 2008). However, there was no indication of muscle  
696 shortening prior to the beginning of neurocranial elevation nor pectoral girdle retraction (Fig. 5).  
697 We conclude that power amplification is unlikely the cause of such high muscle mass-specific  
698 muscle power estimates and that Cb04 was able to power suction feeding directly with 550-800  
699  $W\text{ kg}^{-1}$  of muscle power in its four most powerful suction strikes.

700

### 701 **Concluding remarks**

702         Compared to the three species previously studied with XROMM, royal knifefish are  
703 distinct in the morphology of their postcranial musculoskeletal system and their reliance on  
704 epaxial muscles for suction feeding. In royal knifefish, their epaxial muscles were greater in  
705 mass relative to the hypaxial muscles and shortened rapidly, producing a majority of suction  
706 power with rapid neurocranial elevation. We expect that species with similar morphology  
707 (including a ventrally flexed vertebral column, dorsoventrally deep epaxial muscles, few bones  
708 immediately caudal to the neurocranium, and a high proportion of epaxial muscle mass) can also  
709 produce high power strikes that are generated predominantly by epaxial muscle power and that  
710 utilize large neurocranial elevation. Our results support the growing evidence that postcranial  
711 morphology is important for understanding suction feeding mechanics, and that these feeding  
712 functions have likely shaped the evolution of the axial muscles and skeleton. Royal knifefish  
713 used nearly their entire body musculature to generate their most powerful strikes, broadening the  
714 morphological and phylogenetic range of suction feeding fishes known to power feeding with  
715 body muscles. However, the sternohyoid muscle likely contributed a greater proportion of power  
716 in the lowest performance strikes, demonstrating that the roles of cranial and axial muscles may  
717 vary not only across species, but also among feeding behaviors. Further studies examining the  
718 cranial and axial musculoskeletal systems—and their interaction—are needed to understand how  
719 the morphology of the whole body shapes the evolution and mechanics of suction feeding.

720

### 721 **ACKNOWLEDGEMENTS**

722 We are grateful to Erika Tavares for research administrative support and manuscript edits, to  
723 Peter Falkingham and Stephen Gatesy for their assistance in developing the methods for the  
724 dynamic digital endocast, to David Baier for the XROMM Maya Tools, and to Jake Parsons,  
725 Noah Sims, and Paola Vazquez for their assistance tracking videos.

726

### 727 **COMPETING INTERESTS**

728 We declare no competing or financial interests.

729

### 730 **FUNDING**

731 This work was supported by the US National Science Foundation [DBI-1612230 to A.M.O.,  
732 IOS-1655756 to E.L.B. and A.L.C., DBI-1661129 to E.L.B., and DGE-1644760 to E.B.K.], the  
733 UK Biotechnology and Biological Sciences Research Council [Fellowship BB/R011109/1 to  
734 A.L.C.], and the Bushnell Research and Education Fund [E.B.K., A.M.O.].

735

### 736 **DATA AVAILABILITY**

737 X-ray video, pressure, and CT data and their essential metadata for this publication have been  
738 deposited in the XMAPortal ([xmaportal.org](http://xmaportal.org)), in the study “Knifefish Suction Feeding,” with the  
739 permanent identifier BROWN65. The data will be publicly available under CCBY 4.0 upon  
740 publication in the Public Data Collection “Royal Knifefish data for Li, Kaczmarek et al., 2022”  
741 with the full URL:

742 <https://xmaportal.org/webportal/larequest.php?request=CollectionView&StudyID=65&instit=BR>  
743 [OWN&collectionID=22](https://xmaportal.org/webportal/larequest.php?request=CollectionView&StudyID=65&instit=BR)



744 **REFERENCES**

- 745 **Altringham, J. D., Wardle, C. S. and Smith, C. I.** (1993). Myotomal muscle function at  
746 different locations in the body of a swimming fish. *J. Exp. Biol.* **182**, 191–206.
- 747 **Askew, G. N. and Marsh, R. L.** (2001). The mechanical power output of the pectoralis  
748 muscle of blue-breasted quail (*Coturnix chinensis*): the in vivo length cycle and its  
749 implications for muscle performance. *J. Exp. Biol.* **204**, 3587–3600.
- 750 **Astley, H. C. and Roberts, T. J.** (2012). Evidence for a vertebrate catapult: elastic energy  
751 storage in the plantaris tendon during frog jumping. *Biol. Lett.* **8**, 386–389.  
752 doi:10.1098/rsbl.2011.0982
- 753 **Astley, H. C., Abbott, E. M., Azizi, E., Marsh, R. L., Roberts, T. J.** (2013). Chasing  
754 maximal performance: a cautionary tale from the celebrated jumping frogs of  
755 Calaveras County. *J. Exp. Biol.* **216**, 3947–3953. doi:10.1242/jeb.090357.
- 756 **Brainerd, E. L., Baier, D. B., Gatesy, S. M., Hedrick, T. L., Metzger, K. A., Gilbert, S.  
757 L. and Crisco, J. J.** (2010). X-ray reconstruction of moving morphology (XROMM):  
758 precision, accuracy and applications in comparative biomechanics research. *J. Exp.*  
759 *Zool. Part A Ecol. Genet. Physiol.* **313A**, 262–279. doi:10.1002/jez.589
- 760 **Brainerd, E. L., Blob, R. W., Hedrick, T. L., Creamer, A. T. and Müller, U. K.** (2017).  
761 Data management rubric for video data in organismal biology. *Integr. Comp. Biol.* **57**,  
762 33–47. doi:10.1093/icb/ix060
- 763 **Camp, A. L.** (2021). A neck-like vertebral motion in fish. *Proc. R. Soc. B* **288**, 20211091.  
764 doi:10.1098/rspb.2021.1091
- 765 **Camp, A. L. and Brainerd, E. L.** (2014). Role of axial muscles in powering mouth  
766 expansion during suction feeding in largemouth bass (*Micropterus salmoides*). *J. Exp.*  
767 *Biol.* **217**, 1333–1345. doi:10.1242/jeb.095810
- 768 **Camp, A. L. and Brainerd, E. L.** 2022. A new conceptual framework for the  
769 musculoskeletal biomechanics and physiology of ray-finned fishes. *J. Exp. Biol.* **225**  
770 (Suppl\_1): jeb243376. doi:10.1242/jeb.243376
- 771 **Camp, A. L., Roberts, T. J. and Brainerd, E. L.** (2015). Swimming muscles power  
772 suction feeding in largemouth bass. *Proc. Natl. Acad. Sci.* **112**, 8690–8695.  
773 doi:10.1073/pnas.1508055112

- 774 **Camp, A. L., Astley, H. C., Horner, A. M., Roberts, T. J. and Brainerd, E. L.** (2016).  
775 Fluoromicrometry: A method for measuring muscle length dynamics with biplanar  
776 videofluoroscopy. *J. Exp. Zool.* **325A**, 399–408. doi:10.1002/jez.2031
- 777 **Camp, A. L., Roberts, T. J. and Brainerd, E. L.** (2018). Bluegill sunfish use high power  
778 outputs from axial muscles to generate powerful suction-feeding strikes. *J. Exp. Biol.*  
779 **221**. doi:10.1242/jeb.178160
- 780 **Camp, A. L., Olsen, A. M., Patricia Hernandez, L. and Brainerd, E. L.** (2020). Fishes  
781 can use axial muscles as anchors or motors for powerful suction feeding. *J. Exp. Biol.*  
782 **223**. doi:10.1242/jeb.225649
- 783 **Carroll, A. M.** (2004). Muscle activation and strain during suction feeding in the  
784 largemouth bass *Micropterus salmoides*. *J. Exp. Biol.* **207**, 983–991.  
785 doi:10.1242/jeb.00862
- 786 **Carroll, A. M. and Wainwright, P. C.** (2009). Energetic limitations on suction feeding  
787 performance in centrarchid fishes. *J. Exp. Biol.* **212**, 3241–3251.  
788 doi:10.1242/jeb.033092
- 789 **Carroll, A. M., Wainwright, P. C., Huskey, S. H., Collar, D. C. and Turingan, R. G.**  
790 (2004). Morphology predicts suction feeding performance in centrarchid fishes. *J. Exp.*  
791 *Biol.* **207**, 3873–3881. doi:10.1242/jeb.01227
- 792 **Carroll, A. M., Ambrose, A. M., Anderson, T. A. and Coughlin, D. J.** (2009). Feeding  
793 muscles scale differently from swimming muscles in sunfish (Centrarchidae). *Biol.*  
794 *Lett.* **5**, 274–277. doi:10.1098/rsbl.2008.0647
- 795 **Coombs, S. and Popper, A. N.** (1982). Structure and function of the auditory system in the  
796 clown knifefish, *Notopterus chitala*. *J. Exp. Biol.* **97**, 225–239.  
797 doi:10.1242/jeb.97.1.225
- 798 **Coughlin, D. J. and Carroll, A. M.** (2006). In vitro estimates of power output by epaxial  
799 muscle during feeding in largemouth bass. *Comp. Biochem. Physiol. Part A Mol.*  
800 *Integr. Physiol.* **145**, 533–539. doi:10.1016/j.cbpa.2006.08.026
- 801 **Curtin, N. A., Woledge, R. C. and Aerts, P.** (2005). Muscle directly meets the vast power  
802 demands in agile lizards. *Proc. R. Soc. B* **272**, 581–584. doi:10.1098/rspb.2004.2982
- 803 **Edelsbrunner, H., Kirkpatrick, D. and Seidel, R.** (1983). On the shape of a set of points  
804 in the plane. *IEEE Trans. Inf. Theory.* **29**, 551–559. doi:10.1109/tit.1983.1056714

- 805 **Gidmark, N. J., Staab, K. L., Brainerd, E. L. and Hernandez, L. P.** (2012). Flexibility  
806 in starting posture drives flexibility in kinematic behavior of the kinethmoid-mediated  
807 premaxillary protrusion mechanism in a cyprinid fish, *Cyprinus carpio*. *J. Exp. Biol.*  
808 **215**, 2262–2272. doi:10.1242/jeb.070516
- 809 **Higham, T. E., Day, S. W. and Wainwright, P. C.** (2006). The pressures of suction  
810 feeding: the relation between buccal pressure and induced fluid speed in centrarchid  
811 fishes. *J. Exp. Biol.* **209**, 3281–7. doi:10.1242/jeb.02383
- 812 **Jimenez, Y. E. and Brainerd, E. L.** (2020). Dual function of epaxial musculature for  
813 swimming and suction feeding in largemouth bass. *Proc. R. Soc. B* **287**.  
814 doi:10.1098/rspb.2019.2631
- 815 **Jimenez, Y. E. and Brainerd, E. L.** (2021). Motor control in the epaxial musculature of  
816 bluegill sunfish in feeding and locomotion. *J. Exp. Biol.* **224**. doi:10.1242/jeb.242903
- 817 **Jimenez, Y. E., Camp, A. L., Grindall, J. D. and Brainerd, E. L.** (2018). Axial  
818 morphology and 3D neurocranial kinematics in suction-feeding fishes. *Biol. Open* **7**.  
819 doi:10.1242/bio.036335
- 820 **Jimenez, Y. E., Marsh, R. L. and Brainerd, E. L.** (2021). A biomechanical paradox in  
821 fish: swimming and suction feeding produce orthogonal strain gradients in the axial  
822 musculature. *Sci. Rep.* **11**, 1–9. doi:10.1038/s41598-021-88828-x
- 823 **Knörlein, B. J., Baier, D. B., Gatesy, S. M., Laurence-Chasen, J. D. and Brainerd, E.**  
824 **L.** (2016). Validation of XMA Lab software for marker-based XROMM. *J. Exp. Biol.*  
825 **219**, 3701–3711. doi:10.1242/jeb.145383
- 826 **Lauder, G. V and Liem, K. F.** (1981). Prey capture by *Luciocephalus pulcher*:  
827 implications for models of jaw protrusion in teleost fishes. *Environ. Biol. Fishes* **6**,  
828 257–268.
- 829 **Liem, K. F.** (1967). Functional morphology of the head of the anabantoid teleost fish  
830 *Helostoma temmincki*. *J. Morphol.* **121**, 135–157. doi:10.1002/jmor.1051210204
- 831 **Lomax, J. J., Martinson, T. F., Jimenez, Y. E. and Brainerd, E. L.** (2020). Bifunctional  
832 role of the sternohyoideus muscle during suction feeding in striped surfperch,  
833 *Embiotoca lateralis*. *Integr. Org. Biol.* **2**. doi:10.1093/iob/obaa021
- 834 **Longo, S. J., McGee, M. D., Oufiero, C. E., Waltzek, T. B. and Wainwright, P. C.**  
835 (2016). Body ram, not suction, is the primary axis of suction-feeding diversity in  
836 spiny-rayed fishes. *J. Exp. Biol.* **219**, 119–128. doi:10.1242/jeb.129015

- 837 **Muller, M., Osse, J. W. M. and Verhagen, J. H. G.** (1982). A quantitative  
838 hydrodynamical model of suction feeding in fish. *J. Theor. Biol.* **95**, 49–79.  
839 doi:10.1016/0022-5193(82)90287-9
- 840 **Norton, S. F. and Brainerd, E. L.** (1993). Convergence in the feeding mechanics of  
841 ecomorphologically similar species in the centrarchidae and cichlidae. *J. Exp. Biol.* **29**,  
842 11–29. doi:10.1242/jeb.176.1.11
- 843 **Olsen, A. M., Hernández, L. P., Camp, A. L. and Brainerd, E. L.** (2019). Channel  
844 catfish use higher coordination to capture prey than to swallow. *Proc. R. Soc. B* **286**.  
845 doi:10.1098/rspb.2019.0507
- 846 **Osse, J. W. M.** (1969). Functional morphology of the head of the perch (*Perca Fluviatilis*  
847 *L.*): an electromyographic study. *Netherlands J. Zool.* **19**, 289–392.  
848 doi:10.1163/002829669X00134
- 849 **Sanford, C. P. J. and Lauder, G. V.** (1989). Functional morphology of the “tongue-bite”  
850 in the osteoglossomorph fish *Notopterus*. *J. Morphol.* **202**, 379–408.  
851 doi:10.1002/jmor.1052020307
- 852 **Tegge, S., Hall, J. and Huskey, S.** (2020). Spatial and temporal changes in buccal pressure  
853 during prey-capture in the trumpetfish (*Aulostomus maculatus*). *Zoomorphology* **139**,  
854 85–95. doi:10.1007/s00435-019-00470-4
- 855 **Van Wassenbergh, S.** (2015). A solution strategy to include the opening of the opercular  
856 slits in moving-mesh CFD models of suction feeding. *Integr. Comp. Biol.* **55**, 62–73.  
857 doi:10.1093/icb/icv031
- 858 **Van Wassenbergh, S., Aerts, P. and Herrel, A.** (2005). Scaling of suction-feeding  
859 kinematics and dynamics in the African catfish, *Clarias gariepinus*. *J. Exp. Biol.* **208**,  
860 2103–2114. doi:10.1242/jeb.01603
- 861 **Van Wassenbergh, S., Aerts, P. and Herrel, A.** (2006a). Hydrodynamic modelling of  
862 aquatic suction performance and intra-oral pressures: Limitations for comparative  
863 studies. *J. R. Soc. Interface.* **3**, 507–514. doi:10.1098/rsif.2005.0110
- 864 **Van Wassenbergh, S., Aerts, P. and Herrel, A.** (2006b). Scaling of suction feeding  
865 performance in the catfish *Clarias gariepinus*. *Physiol. Biochem. Zool.* **79**, 43–56.  
866 doi:10.1086/498188

- 867 **Van Wassenbergh, S., Herrel, A., Adriaens, D. and Aerts, P.** (2007a). Interspecific  
868 variation in sternohyoideus muscle morphology in clariid catfishes: functional  
869 implications for suction feeding. *J. Morphol.* **268**, 268–242. doi:10.1002/jmor.10510
- 870 **Van Wassenbergh, S., Herrel, A., James, R. S. and Aerts, P.** (2007b). Scaling of  
871 contractile properties of catfish feeding muscles. *J. Exp. Biol.* **210**, 1183–1193.  
872 doi:10.1242/jeb.000109
- 873 **Van Wassenbergh, S., Strother, J. A., Flammang, B. E., Ferry-Graham, L. A. and**  
874 **Aerts, P.** (2008). Extremely fast prey capture in pipefish is powered by elastic recoil.  
875 *J. R. Soc. Interface* **5**, 285–296. doi:10.1098/rsif.2007.1124
- 876 **Van Wassenbergh, S., Dries, B. and Herrel, A.** (2014). New Insights into Muscle  
877 Function during Pivot Feeding in Seahorses. *PLoS One* **9**, e109068.  
878 doi:10.1371/journal.pone.0109068
- 879 **Van Wassenbergh, S., Day, S. W., Hernández, L. P., Higham, T. E. and Skorczewski,**  
880 **T.** (2015). Suction power output and the inertial cost of rotating the neurocranium to  
881 generate suction in fish. *J. Theor. Biol.* **372**, 159–167. doi:10.1016/j.jtbi.2015.03.001  
882  
883

884 **TABLES**

885 **Table 1.** Mean ( $\pm$  s.e.m) measurements of peak pressure, change in buccal volume, power, total  
 886 body mass, bilateral axial and sternohyoid muscle mass, and peak muscle mass-specific power of  
 887 each individual. Mean peak axial and sternohyoid muscle strain and shortening velocity were  
 888 measured during the period of peak power.

889

| Variable                                                    | Cb01 (N = 6)        | Cb03 (N = 6)       | Cb04 (N = 10)    |
|-------------------------------------------------------------|---------------------|--------------------|------------------|
| Peak pressure, kPa                                          | -7.9 $\pm$ 2.0      | * -15.2 $\pm$ 4.5  | -44.2 $\pm$ 3.5  |
| Peak change in buccal volume, cm <sup>3</sup>               | 23.4 $\pm$ 3.5      | * 15.9 $\pm$ 2.5   | 54.2 $\pm$ 3.4   |
| Peak rate of volume change, cm <sup>3</sup> s <sup>-1</sup> | 1000 $\pm$ 239      | * 829 $\pm$ 178    | 2518 $\pm$ 127   |
| Peak power, W                                               | 6.5 $\pm$ 2.1       | * 15.9 $\pm$ 6.2   | 100.6 $\pm$ 10.5 |
| Total body mass, g                                          | 217                 | 170                | 480              |
| <b>Epaxial</b>                                              |                     |                    |                  |
| ▲ Muscle mass, g                                            | 52.7                | ** 44.1            | 125.2            |
| Initial muscle length, mm                                   | 115.1 $\pm$ 0.6     | 109.4 $\pm$ 0.5    | 103.4 $\pm$ 0.2  |
| Peak muscle strain, %                                       | 3.4 $\pm$ 0.4       | 7.9 $\pm$ 1.4      | 8.0 $\pm$ 0.7    |
| Peak muscle velocity, L <sub>i</sub> s <sup>-1</sup>        | 2.0 $\pm$ 0.2       | 4.6 $\pm$ 1.5      | 4.7 $\pm$ 0.1    |
| <b>Hypaxial</b>                                             |                     |                    |                  |
| Muscle mass, g                                              | 27.5                | ** 25.5            | 73.7             |
| Initial muscle length, mm                                   | *** 100.4 $\pm$ 3.0 | **** _____         | 65.3 $\pm$ 0.5   |
| Peak muscle strain, %                                       | *** 1.8 $\pm$ 2.8   | **** _____         | -1.1 $\pm$ 1.3   |
| Peak muscle velocity, L <sub>i</sub> s <sup>-1</sup>        | *** 1.7 $\pm$ 0.7   | **** _____         | 4.1 $\pm$ 0.3    |
| <b>Sternohyoid</b>                                          |                     |                    |                  |
| Muscle mass, g                                              | 2.0                 | ** 1.5             | 4.6              |
| Initial muscle length, mm                                   | 21.2 $\pm$ 0.07     | 9.3 $\pm$ 0.05     | 15.3 $\pm$ 0.01  |
| Peak muscle strain, %                                       | 2.5 $\pm$ 0.7       | 2.5 $\pm$ 1.0      | 2.7 $\pm$ 0.4    |
| Peak muscle velocity, L <sub>i</sub> s <sup>-1</sup>        | 2.7 $\pm$ 0.8       | 4.2 $\pm$ 0.9      | 4.8 $\pm$ 0.4    |
| Peak muscle mass-specific power, W kg <sup>-1</sup>         | 79.1 $\pm$ 25.6     | * 223.6 $\pm$ 87.2 | 494.3 $\pm$ 16.2 |

\* Pressure, volume, and power values for Cb03 were measured for N = 7.

▲ Dorsal column muscle mass is included in the total epaxial muscle masses.

\*\* Bilateral muscle mass was estimated for Cb03 because individual was not available for muscle dissection.

\*\*\* Shortening of ventral (anal fin) muscle are reported here because hypaxial beads were not present in Cb01.

\*\*\*\* Hypaxial values were not recorded because hypaxial beads were not present in Cb03.

890

891 **Table 2.** Comparative measurements for largemouth bass (*Micropterus salmoides*), bluegill  
 892 sunfish (*Lepomis macrochirus*), channel catfish (*Ictalurus punctatus*), and royal knifefish  
 893 (*Chitala blanci*). Data shown for royal knifefish are from this study, and data for other species  
 894 are from previously published datasets (largemouth bass data from Camp et al., 2015; bluegill  
 895 sunfish data from Camp et al., 2018; and channel catfish data from Camp et al., 2020). Where  
 896 error values are included, they are the s.e.m (standard error of measurement).  
 897

| Variable                                                                                       | Largemouth<br>Bass | Bluegill<br>Sunfish | Channel<br>Catfish | Royal<br>Knifefish               |
|------------------------------------------------------------------------------------------------|--------------------|---------------------|--------------------|----------------------------------|
| Across individuals                                                                             | N = 3              | N = 2               | N = 3              | N = 3                            |
| Mean epaxial mass per body mass (%)                                                            | 17.8 ± 2.9         | 16.1 ± 0.04         | 12.5 ± 1.0         | 25.4 ± 0.6                       |
| Mean neurocranial elevation (deg)                                                              | * 16.0             | * 12.7              | * -1.6             | *▲ 24.7                          |
| Maximum neurocranial elevation (deg)                                                           | * 26.0             | * 17.0              | ** —               | * 41.0                           |
| Mean cleithral retraction (deg)                                                                | * -9.3             | * -6.0              | * -7.7             | * -2.0                           |
| Highest performing individual                                                                  | Bass02             | Bluegill 1          | Cat5               | Cb04                             |
| Body mass (g)                                                                                  | 447                | 164                 | 860                | 480                              |
| ***** Contributing muscle mass (g)                                                             | 106.4              | 42.7                | 144.22             | 203.5                            |
| Mean peak values of the highest<br>performing individual                                       | N = 9              | N = 6               | N = 9              | N = 10                           |
| Pressure (kPa)                                                                                 | -9.7 ± 1.4         | -32.2 ± 2.2         | -18.4 ± 3.1        | -44.2 ± 3.5                      |
| Rate of volume change (cm <sup>3</sup> s <sup>-1</sup> )                                       | 882 ± 87           | 387 ± 58            | 928 ± 70           | 2518 ± 127                       |
| Power (W)                                                                                      | 7.9 ± 1.4          | 11.4 ± 2.1          | 13.9 ± 2.9         | 100.6 ± 10.5                     |
| Body mass-specific power (W kg <sup>-1</sup> )                                                 | 17.7 ± 3.1         | 69.5 ± 12.8         | 16.2 ± 3.4         | 209.6 ± 21.9                     |
| Muscle mass-specific power (W kg <sup>-1</sup> )                                               | 74.2 ± 13.2        | 267.0 ± 49.2        | 96.4 ± 20.1        | 494.3 ± 51.6                     |
| Body mass-specific rate of volume<br>change (cm <sup>3</sup> s <sup>-1</sup> g <sup>-1</sup> ) | 2.0 ± 0.2          | 2.4 ± 0.4           | 1.1 ± 0.1          | 5.2 ± 0.3                        |
| Epaxial strain (% L <sub>i</sub> )                                                             | *** 4.6 ± 0.3      | 3.9 ± 0.5           | -0.4 ± 0.7         | ▲ 8.0 ± 0.7                      |
| Epaxial shortening velocity (L <sub>i</sub> s <sup>-1</sup> )                                  | *** 1.2 ± 0.2      | ▲ 2.2 ± 0.3         | ▲ 0.1 ± 0.04       | ▲ 4.7 ± 0.1                      |
| Hypaxial strain (%L <sub>i</sub> )                                                             | *** 8.4 ± 1.7      | 6.8 ± 0.6           | 8.3 ± 2.4          | ▲ -1.1 ± 1.3;<br>****▲ 3.0 ± 0.3 |
| Hypaxial shortening velocity (L <sub>i</sub> s <sup>-1</sup> )                                 | *** 1.6 ± 0.6      | ▲ 3.4 ± 0.2         | ▲ 1.3 ± 0.1        | ▲ 4.1 ± 0.3                      |

\* Positive values for neurocranial and cleithral rotation represent elevation, while negative values represent retraction.

\*\* Maximum neurocranium elevation for channel catfish was not reported because neurocranium consistently depressed rather than elevated.

▲ Measurements were made during the period of peak power rather than the maximum recorded value during the strike.

---

\*\*\* For axial muscle strain  $N = 10$ , and for axial muscle shortening velocity  $N = 6$ .

\*\*\*\* Hypaxial strain was measured with  $L_i$  defined at the start of shortening rather than the start of the strike.

\*\*\*\*\* Contributing muscle mass only includes the mass of axial muscle that shortened and the sternohyoid if it shortened (all species but largemouth bass).

---

898

## 899 **FIGURE LEGENDS**

900 **Fig. 1. Body shape and anatomy of the axial musculature and skeleton in royal knifefish,**  
901 ***Chitala blanci*, compared with the body shapes of three other species for which suction**  
902 **power has been measured. (A)** Lateral view of the neurocranium, cleithrum, and left-side bones  
903 of the head in *C. blanci*. Dashed line indicates the approximate location of the cross-section  
904 shown in (B). (B) Transverse cross-section of *C. blanci*, illustrating its inverted teardrop shape.  
905 (C) Whole-body shape and (D) transverse cross-section comparisons of *C. blanci* to other  
906 previously studied species: channel catfish (*Ictalurus punctatus*), bluegill sunfish (*Lepomis*  
907 *macrochirus*), and largemouth bass (*Micropterus salmoides*). Fishes are shown with expanded  
908 mouths in (C).

909

910 **Fig. 2. Sample XROMM animation and measurement of buccal cavity volume before and**  
911 **during suction expansion.** Animated bone models before suction expansion (A,C,E) and during  
912 suction expansion (B,D,F). (A,B) Right lateral view of X-ray image with animated  
913 neurocranium, left cleithrum, and left-side bone meshes. Surgically implanted bone and  
914 intramuscular (epaxial, hypaxial, dorsal column, and sternohyoid) markers are visible as black  
915 circles. (C,D) Left lateral view of animated bone models and (E,F) animated dynamic endocast  
916 of buccal cavity volume.

917

918 **Fig. 3. Buccal volume, rate of volume change, intraoral pressure, and suction power in the**  
919 **highest power strike. (A)** Buccal volume, measured using dynamic endocast. (B) Rate of  
920 volume change (black, left axis) and intraoral pressure relative to ambient pressure (blue, right  
921 axis). (C) Suction power was calculated as the product of intraoral pressure and rate of volume  
922 change at each time point. Peak suction power (within 25% of maximum) is indicated by the  
923 shaded region with the corresponding values highlighted in red.

924



925 **Fig. 4. Suction power (W) and muscle mass-specific power ( $\text{W kg}^{-1}$ ) in three royal knifefish.**

926 Absolute suction power (left y-axis) is plotted relative to peak gape for each strike in each  
927 individual. The right y-axis shows muscle mass-specific power, which divides suction power by  
928 the combined mass of the epaxial and hypaxial shortening regions and the sternohyoid.

929

930 **Fig. 5. Neurocranium and cleithrum rotations relative to the body plane and muscle length**  
931 **changes during buccal expansion in royal knifefish.** Data from each individual are shown

932 separately, with the period of peak power (within 25% of maximum) highlighted in red and the  
933 time of peak power marked with a red dot. (A) Z-axis rotation (relative to initial values) of the  
934 neurocranium (row 1) and left cleithrum (row 2) relative to the body plane. Positive values  
935 represent elevation or protraction (white region), while negative values represent depression or  
936 retraction (shaded region). (B) For each muscle (bottom three rows), muscle length was  
937 normalized by its mean initial length ( $L_i$ ). Values below 1 (shaded region) represent shortened  
938 muscle, while those greater than 1 (white region) represent lengthened muscle relative to  $L_i$ .

939

940 **Fig. 6. Maximum epaxial and hypaxial muscle strain along the body.** (A) Epaxial strain and  
941 (B) ventral (anal fin) muscle and hypaxial strain during the period of peak power were calculated  
942 as percent change in length relative to the mean initial length ( $L_i$ ) in subregions along the cranial  
943 half of the body. Maximum strain for each strike (red or blue circles) and mean strain (red or  
944 blue bars) across all strikes are shown for each subregion with positive values representing  
945 muscle shortening. The width of the bar reflects the craniocaudal length of each muscle  
946 subregion. Note that Cb03 did not have ventral or hypaxial strain data.

947

948 **Fig. 7. Comparison of suction power of royal knifefish to three other species.** Data are shown

949 for royal knifefish ( $n = 23$  strikes, from this study), channel catfish ( $n = 24$  strikes, data from  
950 Camp et al., 2020), largemouth bass ( $n = 29$  strikes, data from Camp et al., 2015), and bluegill  
951 sunfish ( $n = 11$  strikes, data from Camp et al., 2018). Power per strike (colored circles) and  
952 average power across all strikes from each individual (black circles) are shown. For all species,  
953 suction power was calculated as (A) the absolute magnitude of maximum suction power, (B)  
954 maximum suction power relative to the total body mass of the individual, and (C) maximum  
955 suction power relative to the maximum change in buccal volume for each strike.

**A**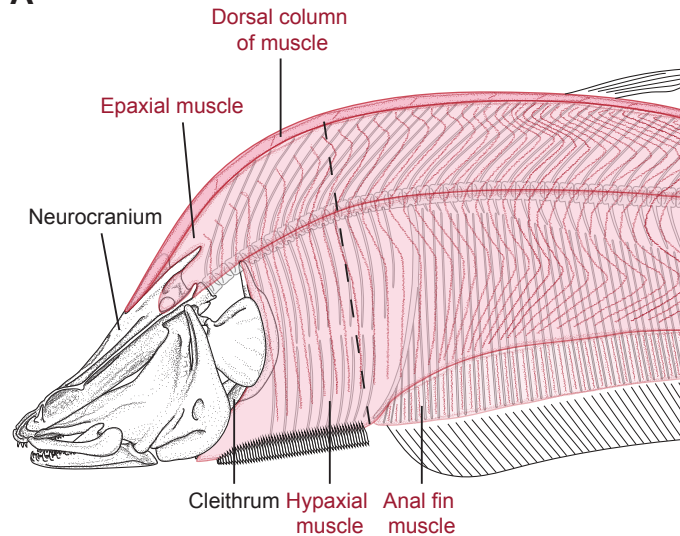**B**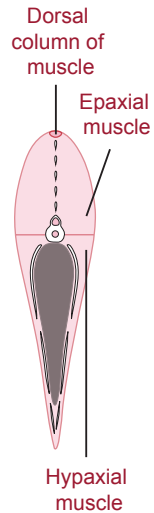**C**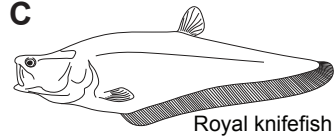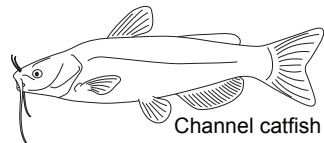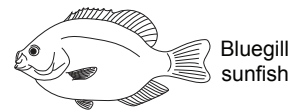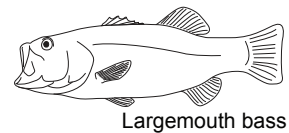**D**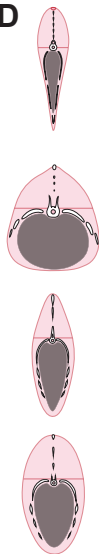

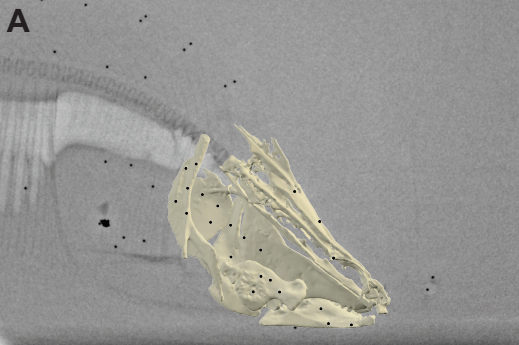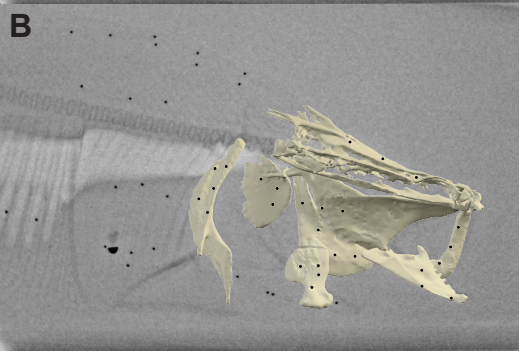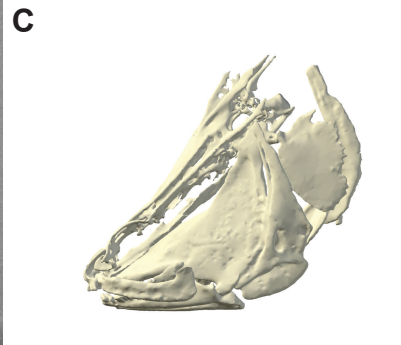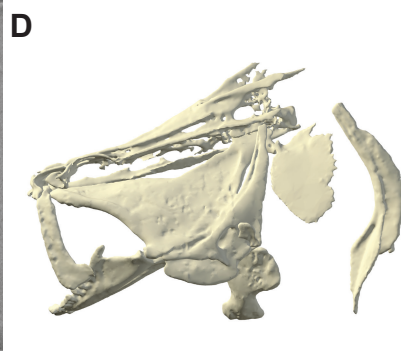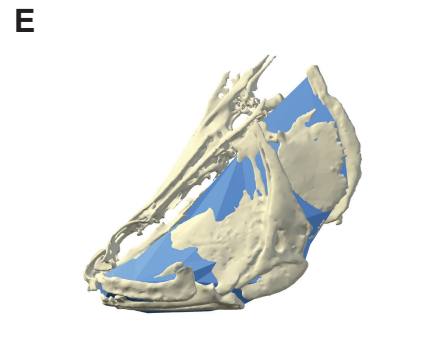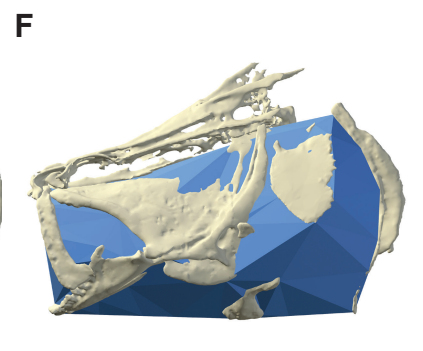

**A**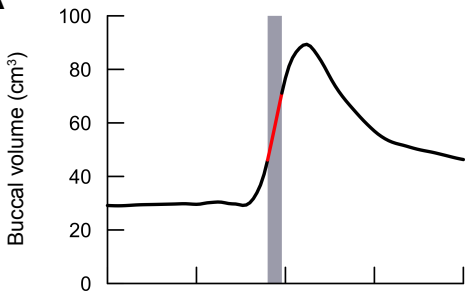**B**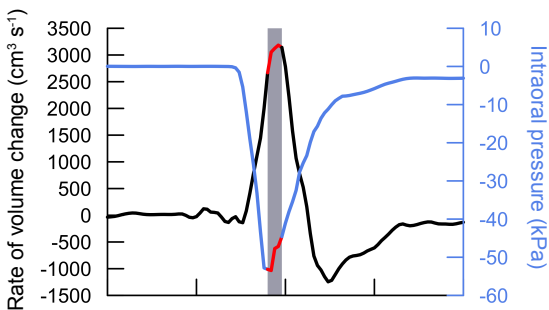**C**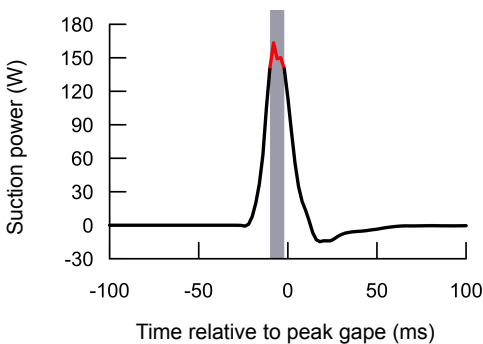

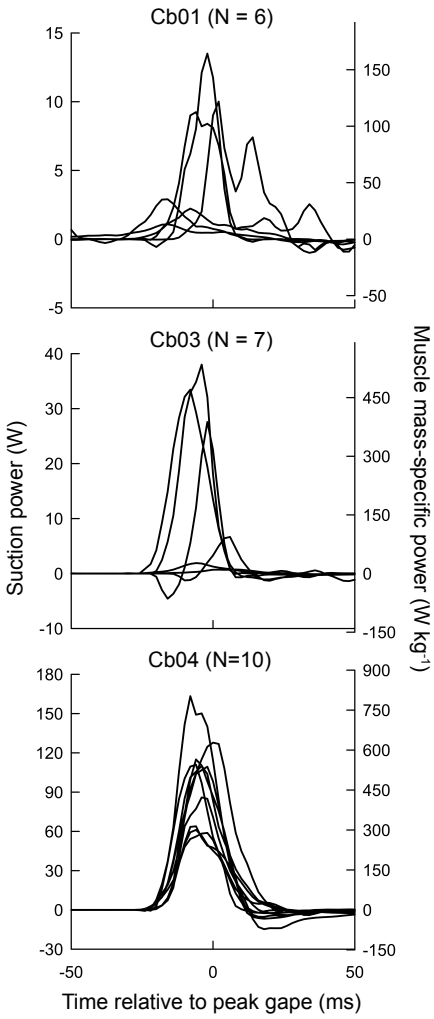

Cb01 (N=6)

Cb03 (N=6)

Cb04 (N=10)

**A** Neurocranium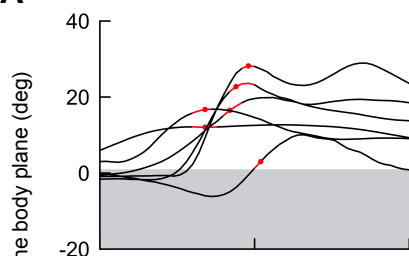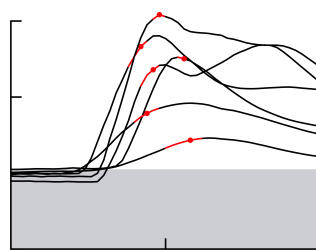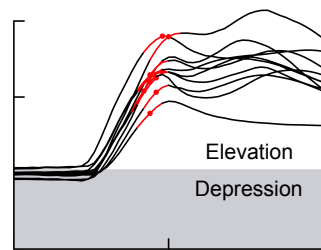

## Cleithrum

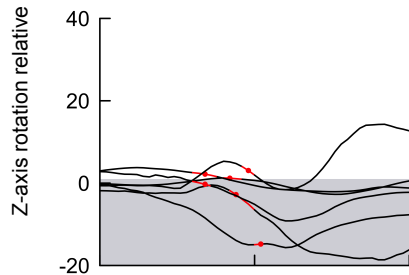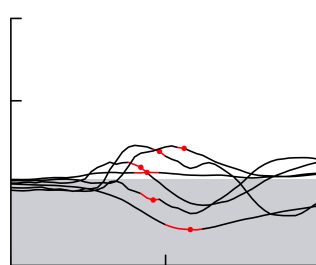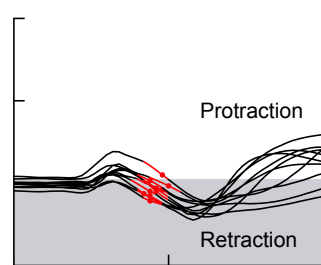**B** Epaxial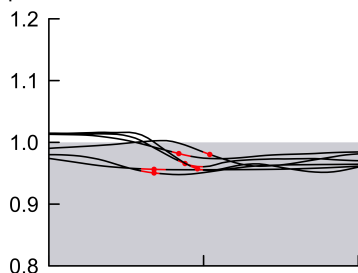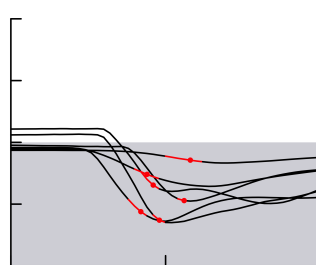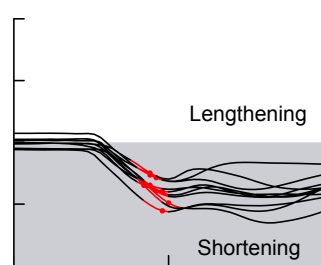

## Ventral muscle

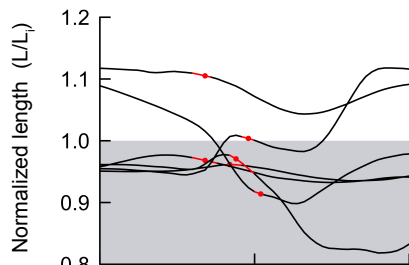

## Hypaxial

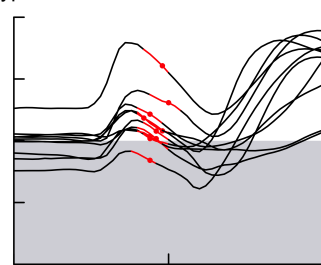

## Sternohyoid

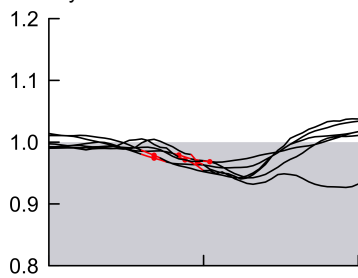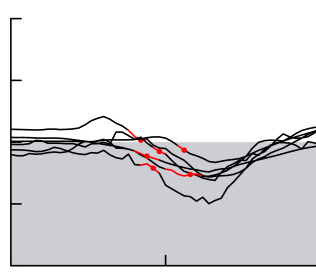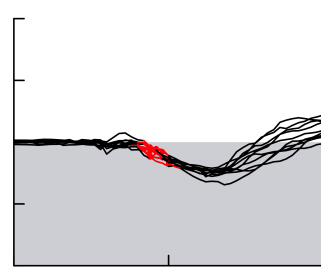

-50 0 50

-50 0 50

-50 0 50

Time relative to peak gape (ms)

Maximum strain during period of peak power (%L<sub>1</sub>)

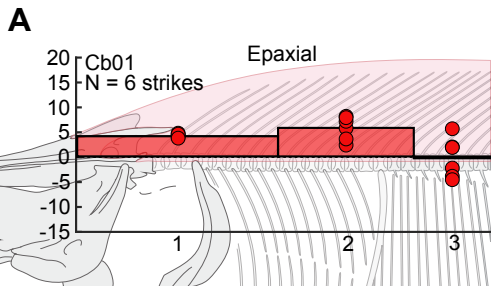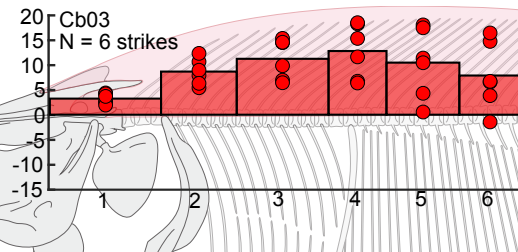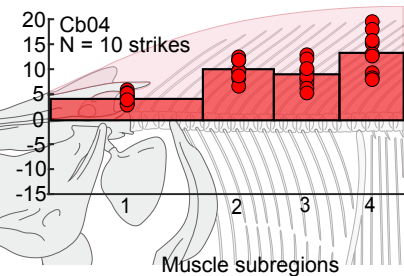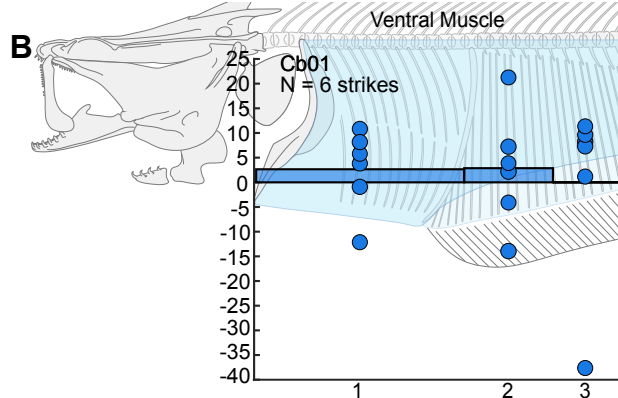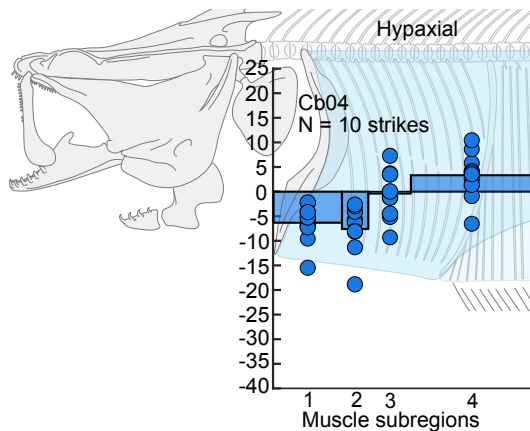

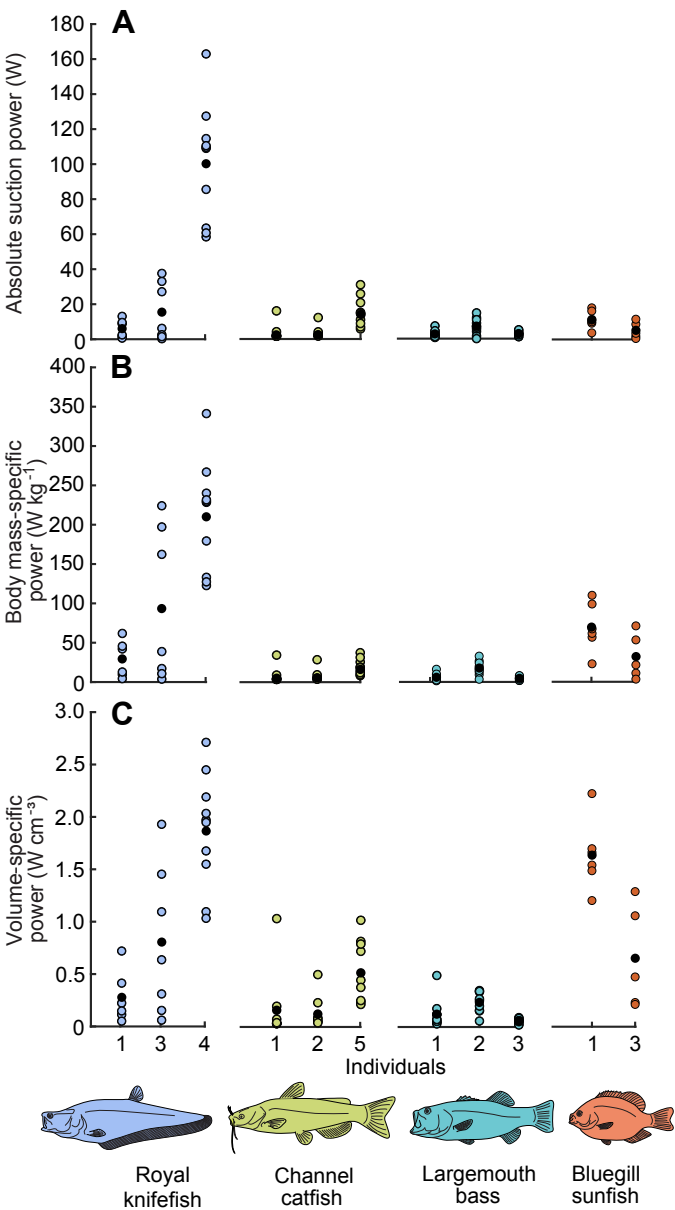

Source: https://www.biorxiv.org/content/biorxiv/early/2022/03/18/2022.01.17.476172.full.pdf
